# Supplementary material for: Genetic Variation in Host-Specific Competitiveness of the Symbiont Rhizobium leguminosarum Symbiovar viciae
Source: Front Plant Sci. 2021 Sep 8;12:719987. doi: 10.3389/fpls.2021.719987 (PMC8457355; doi:10.3389/fpls.2021.719987)
Supplement: Supplementary Table 1 — Genomic data of the sequenced Rlv bacteria. [file Table_1.xlsx]

## Sheet: Supplementary table S1
Supplementary table S1: Genomic data of the sequenced Rlv bacteria.
New genomes (only described by partial sequences in Genbank)
Rhizobial strains	Host plant species	Locations	references/strain provider	Genome					Clades
				GenBank accession	Size (bp)	G + C (%)	Contigs (nb)	Predicted CDS (nb)	Genospecies	Nod groups
BLR195	Lens culinaris	Bangladesh	Markus Braun (Heidelberg University)	GCA_012276575	6977610	61.09	128	6659	Rhizobium binae	B4
CCBAU03058	Vicia faba	China	Xinhua Sui and Changfu Tian (China Agricultural University, Beijing)	GCA_012276615	8721286	59.45	217	7993	gsB	B5
CCBAU10279	Vicia faba	China	Xinhua Sui and Changfu Tian (China Agricultural University, Beijing)	GCA_012276585	7389705	60.86	86	7128	gsR	B5
CCBAU11080	Vicia faba	China	Xinhua Sui and Changfu Tian (China Agricultural University, Beijing)	GCA_012276545	7850045	60.66	119	7598	gsG	B5
CCBAU33195	Vicia faba	China	Xinhua Sui and Changfu Tian (China Agricultural University, Beijing)	GCA_012276535	7745130	60.81	112	7333	gsG	B3
CCBAU43229	Vicia faba	China	Xinhua Sui and Changfu Tian (China Agricultural University, Beijing)	GCA_012276505	6992570	61.13	64	6728	Rhizobium anhuiense	B3
CCBAU65264	Vicia faba	China	Xinhua Sui and Changfu Tian (China Agricultural University, Beijing)	GCA_012276485	8009995	60.75	168	7663	gsB	B5
CCBAU83268	Vicia faba	China	Xinhua Sui and Changfu Tian (China Agricultural University, Beijing)	GCA_012276475	7414515	60.76	100	7166	gsN	B5
CL8	Lens culinaris	Algeria	Riah et al., 2014	GCA_012276455	7088044	60.82	41	6880	gsR	B4
GB29	Pisum sativum	Poland	Jerzy Wielbo, Anna Skorupska and Andrzej Mazur (Lublin University)	GCA_012276435	7657220	60.73	80	7381	gsC	A1
GB51	Pisum sativum	Poland	Jerzy Wielbo, Anna Skorupska and Andrzej Mazur (Lublin University)	GCA_012276395	7488713	60.64	68	7200	gsE	A1
GD25	Pisum sativum	Poland	Jerzy Wielbo, Anna Skorupska and Andrzej Mazur (Lublin University)	GCA_012276375	7479287	60.63	56	7164	gsE	A4
GLR17	Lens culinaris	Germany	Markus Braun (Heidelberg University)	GCA_012276335	7449951	60.88	104	7236	gsQ	B4
GLR2	Lens culinaris	Germany	Markus Braun (Heidelberg University)	GCA_012276355	7708757	60.77	72	7424	gsQ	B4
HP3	Pisum sativum	Algeria	Riah et al., 2014	GCA_012276365	7118882	60.87	73	6906	gsR	B2
IAUb11	Pisum sativum	France	Laguerre et al, 2007	GCA_012275645	7517736	60.65	77	7201	gsE	A4
L113	Lens culinaris	France	Sylvie Mazurier (INRAE Dijon)	GCA_012275605	7888019	60.58	125	7638	gsE	A1
L116	Lens culinaris	France	Sylvie Mazurier (INRAE Dijon)	GCA_012276295	7610606	60.75	88	7387	gsC	A1
L125	Lens culinaris	France	Sylvie Mazurier (INRAE Dijon)	GCA_012276315	7687557	60.61	60	7381	gsE	A1
L141	Lens culinaris	France	Sylvie Mazurier (INRAE Dijon)	GCA_012276275	7319682	60.84	58	7129	gsN	B1
L143	Lens culinaris	France	Sylvie Mazurier (INRAE Dijon)	GCA_012276245	7566527	60.77	70	7335	gsN	B3
L144	Lens culinaris	France	Sylvie Mazurier (INRAE Dijon)	GCA_012276225	7091756	61.01	82	6873	gsQ	A3
L145	Lens culinaris	France	Sylvie Mazurier (INRAE Dijon)	GCA_012276215	7908242	60.59	77	7628	gsD	A4
L231	Lens culinaris	France	Sylvie Mazurier (INRAE Dijon)	GCA_012276175	7356283	60.79	93	7160	gsN	B4
L241	Lens culinaris	France	Sylvie Mazurier (INRAE Dijon)	GCA_012276195	7520121	60.74	78	7308	gsQ	B4
L244	Lens culinaris	France	Sylvie Mazurier (INRAE Dijon)	GCA_012276155	7542902	60.77	212	7369	gsN	B4
L324	Lens culinaris	France	Sylvie Mazurier (INRAE Dijon)	GCA_012276125	7814262	60.56	54	7541	gsE	A4
L353	Lens culinaris	France	Sylvie Mazurier (INRAE Dijon)	GCA_012276115	7130736	60.96	68	6935	gsQ	B2
L361	Lens culinaris	France	Sylvie Mazurier (INRAE Dijon)	GCA_012276075	7494746	60.82	88	7337	gsN	B4
L364	Lens culinaris	France	Sylvie Mazurier (INRAE Dijon)	GCA_012276085	7394242	60.81	66	7188	gsN	B4
L411	Lens culinaris	France	Sylvie Mazurier (INRAE Dijon)	GCA_012275615	7253924	60.84	75	7108	gsO	B4
L563	Lens culinaris	France	Sylvie Mazurier (INRAE Dijon)	GCA_012276025	7344954	60.84	86	7159	gsN	B4
Lp8	Lathyrus pratensis	United Kingdom	Mutch and Young, 2004	GCA_012276035	8169054	60.64	207	7852	gsC	A4
OL29	Lens culinaris	Algeria	Riah et al., 2014	GCA_012275995	7251129	60.79	103	6985	gsR	B3
OS25	Pisum sativum	Algeria	Riah et al., 2014	GCA_012276015	7374548	60.78	66	7115	gsR	B3
P1.14	Pisum sativum	Poland	Jerzy Wielbo, Anna Skorupska and Andrzej Mazur (Lublin University)	GCA_012275975	7675550	60.56	93	7398	gsE	A1
P221	Pisum sativum	France	Laguerre et al, 2007	GCA_012275915	7934416	60.74	56	7063	gsE	A1
P1NP1J	Pisum sativum	France	Laguerre et al, 2007	GCA_012275665	7934416	60.74	49	7586	gsB	A4
P1NP2H	Pisum sativum	France	Laguerre et al, 2007	GCA_012275945	7682210	60.89	57	7281	gsB	A4
P1NP2K	Pisum sativum	France	Laguerre et al, 2007	GCA_012275875	7535517	60.93	92	7215	gsB	A3
P2.5	Pisum sativum	Poland	Jerzy Wielbo, Anna Skorupska and Andrzej Mazur (Lublin University)	GCA_012275925	7539015	60.74	76	7246	gsC	A1
P2.59	Pisum sativum	Poland	Jerzy Wielbo, Anna Skorupska and Andrzej Mazur (Lublin University)	GCA_012275835	7598779	60.62	75	7281	gsE	A1
SL16	Lens culinaris	Algeria	Riah et al., 2014	GCA_012275885	7153517	60.86	61	6828	gsR	B3
SP15	Pisum sativum	Algeria	Riah et al., 2014	GCA_012275855	7334563	60.76	80	7059	gsR	B3
SP4	Pisum sativum	Algeria	Riah et al., 2014	GCA_012275785	7396718	60.76	83	7198	gsR	B3
SS21	Pisum sativum	Algeria	Riah et al., 2014	GCA_012275795	7394641	60.83	46	7199	gsR	B3
UPM1134	Pisum sativum	Italy	Jorrin et al., 2020	GCA_012275745	7485526	60.79	103	7191	gsC	A5
UPM988	Pisum sativum	France	Juan Impeerial (Instituto de Ciencas Agrarias, Madrid)	GCA_012275595	7709058	60.67	117	7367	gsE	A1
Genomes sequences publicly available in NCBI genbank (https://www.ncbi.nlm.nih.gov/genbank/ ).
Rhizobial strains	Host plant species	Locations	references	Genome					Clades
				GenBank accession	Size (bp)	G + C (%)	Contigs (nb)	Predicted CDS (nb)	Genospecies	Nod groups
248	Vicia faba	United Kingdom	Seshadri et al., 2015	GCA_000385155	728851	60.9	7	6821	gsQ	B1
3841	Vicia faba	United Kingdom	Young et al., 2006	GCA_000009265	775131	60.9	7	7219	gsB	B1
128C53	Pisum sativum	United Kingdom	Seshadri et al., 2015	GCA_000373425	760923	60.6	75	7070	gsE	A4
BIHB1217	Pisum sativum	India		GCA_002243365	795255	60.6	7	7439	gsE	A3
CZF1B5	Vicia faba	Czech Republic	Boivin et al. 2020	GCA_004330975	7578553	60.73	76	7311	gsC	B1
CZF1F8	Vicia faba	Czech Republic	Boivin et al. 2020	GCA_004330935	7155668	60.76	65	6845	gsE	B1
CZF5B4	Vicia faba	Czech Republic	Boivin et al. 2020	GCA_004330955	7544341	60.82	58	7468	gsC	A1
CZF5G8	Vicia faba	Czech Republic	Boivin et al. 2020	GCA_004330945	7660652	60.75	63	7339	gsC	A1
CZP1G1	Pisum sativum	Czech Republic	Boivin et al. 2020	GCA_004330915	7590854	60.59	83	7326	gsE	A1
CZP1G4	Pisum sativum	Czech Republic	Boivin et al. 2020	GCA_004330845	7490401	60.66	57	7208	gsE	A1
CZP1G9	Pisum sativum	Czech Republic	Boivin et al. 2020	GCA_004330865	7813379	60.5	73	7493	gsE	A1
CZP1H7	Pisum sativum	Czech Republic	Boivin et al. 2020	GCA_004330855	7740052	60.5	98	7405	gsE	A1
CZP2D2	Pisum sativum	Czech Republic	Boivin et al. 2020	GCA_004330835	7509426	60.77	90	7196	gsC	A1
CZP2H1	Pisum sativum	Czech Republic	Boivin et al. 2020	GCA_004330815	7351646	60.84	99	7037	gsC	A1
CZP3C9	Pisum sativum	Czech Republic	Boivin et al. 2020	GCA_004330755	7738601	60.6	63	7452	gsE	A1
CZP3G4	Pisum sativum	Czech Republic	Boivin et al. 2020	GCA_004330745	7131618	60.77	88	6973	Rhizobium pisi	A1
CZP3G7	Pisum sativum	Czech Republic	Boivin et al. 2020	GCA_004330735	7142686	60.76	68	6814	gsE	B1
CZP3H6	Pisum sativum	Czech Republic	Boivin et al. 2020	GCA_004330725	7622555	60.76	80	7388	gsC	A1
CZP3H7	Pisum sativum	Czech Republic	Boivin et al. 2020	GCA_004330715	7475690	60.67	82	7138	gsE	A1
FB206	Vicia faba	Tunisia		GCA_002008165	7323210	60.8	33	6833	gsR	B1
FRF1A1	Vicia faba	France	Boivin et al. 2020	GCA_004330635	7690799	60.67	67	7367	gsE	B1
FRF1D12	Vicia faba	France	Boivin et al. 2020	GCA_004330655	6943434	61	60	6649	gsN	B1
FRF1H7	Vicia faba	France	Boivin et al. 2020	GCA_004330625	7477737	60.77	136	7145	gsC	A1
FRF3E2	Vicia faba	France	Boivin et al. 2020	GCA_004330645	7780884	60.64	96	7437	gsE	B1
FRP2D7	Pisum sativum	France	Boivin et al. 2020	GCA_004330615	7233520	60.83	45	6917	gsE	B1
FRP3A12	Pisum sativum	France	Boivin et al. 2020	GCA_004330515	7394323	60.76	72	7133	gsE	B1
FRP3E11	Pisum sativum	France	Boivin et al. 2020	GCA_004330545	7568774	60.67	87	7287	gsE	B3
FRP3E5	Pisum sativum	France	Boivin et al. 2020	GCA_004330535	7396989	60.75	63	7101	gsE	B1
FRP3G5	Pisum sativum	France	Boivin et al. 2020	GCA_004330525	7548870	60.67	59	7244	gsE	B3
FRP4D11	Pisum sativum	France	Boivin et al. 2020	GCA_004330555	7433351	60.7	52	7154	gsE	A3
FRP4H3	Pisum sativum	France	Boivin et al. 2020	GCA_004330265	7537822	60.66	84	7199	gsE	B1
FRP5A4	Pisum sativum	France	Boivin et al. 2020	GCA_004330235	7784290	60.66	83	7488	gsE	B1
FRP5C5	Pisum sativum	France	Boivin et al. 2020	GCA_004330225	7317781	60.73	55	7018	gsE	B1
FRP5D3	Pisum sativum	France	Boivin et al. 2020	GCA_004330205	7666342	60.63	51	7354	gsE	A3
FRP5H7	Pisum sativum	France	Boivin et al. 2020	GCA_004330185	7561449	60.68	68	7280	gsE	A1
GB30	Pisum sativum	Poland	Seshadri et al., 2015	GCA_000419745	746846	60.8	78	6985	gsC	A1
Norway	Lotus corniculatus	Norway		GCA_002953715	778808	60.7	6	7158	gsD	A5
Ps8	Pisum sativum	United Kingdom	Mutch and Young, 2004	GCA_000375705	755298	60.8	69	7029	gsC	A1
RCAM1026	Pisum sativum	Kazakhstan		GCA_001927265	723940	60.8	133	6718	gsC	A1
RSF1B9	Vicia faba	Serbia	Boivin et al. 2020	GCA_004330175	6934263	61.03	45	6692	gsN	B1
RSF2G1	Vicia faba	Serbia	Boivin et al. 2020	GCA_004330135	8184829	61.2	54	7278	gsB	A1
RSP1A1	Pisum sativum	Serbia	Boivin et al. 2020	GCA_004330105	7483734	60.71	149	7222	gsN	A3
RSP1E11	Pisum sativum	Serbia	Boivin et al. 2020	GCA_004330095	7587633	60.64	102	7327	gsE	A1
RSP1E6	Pisum sativum	Serbia	Boivin et al. 2020	GCA_004330085	7630007	60.89	139	7221	gsB	A3
RSP1F10	Pisum sativum	Serbia	Boivin et al. 2020	GCA_004330075	7325173	60.81	154	7058	gsN	A3
RSP1F2	Pisum sativum	Serbia	Boivin et al. 2020	GCA_004330005	7105424	60.9	57	6828	gsN	A1
SEF4B9	Vicia faba	Sweden	Boivin et al. 2020	GCA_004330015	7688566	60.77	81	7403	gsC	B1
SEF4G12	Vicia faba	Sweden	Boivin et al. 2020	GCA_004329985	6875649	61.1	57	6614	New species near R. acidisoli	B1
SEF4H7	Vicia faba	Sweden	Boivin et al. 2020	GCA_004329995	8348059	60.8	147	7644	gsC	A1
SEF5C12	Vicia faba	Sweden	Boivin et al. 2020	GCA_004329975	7579753	60.81	53	7300	gsC	A1
SEP2G2	Pisum sativum	Sweden	Boivin et al. 2020	GCA_004329895	7923147	60.51	127	7591	gsE	A3
SEP3F1	Pisum sativum	Sweden	Boivin et al. 2020	GCA_004329915	7372819	60.71	51	7100	gsE	A1
SEP4B10	Pisum sativum	Sweden	Boivin et al. 2020	GCA_004329875	6798634	60.64	44	6568	gsE	A1
SEP5D11	Pisum sativum	Sweden	Boivin et al. 2020	GCA_004329885	7855733	60.53	130	7590	gsE	A1
SEP5D7	Pisum sativum	Sweden	Boivin et al. 2020	GCA_004329905	7582272	60.65	111	7331	gsE	A1
SPF2A11	Vicia faba	Spain	Boivin et al. 2020	GCA_004329805	7181319	60.91	63	6989	gsR	B1
SPF2F4	Vicia faba	Spain	Boivin et al. 2020	GCA_004329785	7224632	60.83	59	6998	gsR	B1
SPF4F3	Vicia faba	Spain	Boivin et al. 2020	GCA_004329775	7679621	60.89	72	7277	gsB	A1
SPF4F7	Vicia faba	Spain	Boivin et al. 2020	GCA_004329795	7044287	60.9	50	6814	gsR	B1
TOM	Pisum sativum	Turkey	Seshadri et al., 2015	GCA_000372205	735767	60.8	6	6813	gsN	B5
UPM1131	Pisum sativum	Italy	Seshadri et al., 2015	GCA_000427945	723197	60.9	42	6675	gsO	A5
UPM1137	Pisum sativum	Italy	Seshadri et al., 2015	GCA_000427705	769535	60.6	53	7207	gsE	A4
UPM791	Pisum sativum	USA	Sánchez-Cañizares et al. 2018	GCA_002948295	783757	60.52	6	7158	gsE	A4
USDA2370	Pisum sativum	Tunisia		GCA_002008365	785194	60.6	72	7229	gsE	A3
Vaf10	Vavilosa formosa	Russia		GCA_001679785	856782	60.53	8	7681	gsN	A2
Vaf108	Vavilosa formosa	Russia		GCA_001890425	844734	60.5	9	7605	gsN	A2
Vaf12	Vavilosa formosa	Russia		GCA_001612535	766568	60.7	166	7114	gsB	A2
Vaf46	Vavilosa formosa	Russia		GCA_001652265	817711	60.6	472	7453	gsC	A2
Vc2	Vicia craca	United Kingdom	Seshadri, R et al., 2015	GCA_000373285	780717	60.7	143	7174	gsC	A1
VF39	Vicia faba	United Kingdom		GCA_000427765	764740	60.8	90	7107	gsB	B1
Vh3	Vicia hirsuta	United Kingdom	Seshadri, R et al., 2015	GCA_000373325	784862	60.7	88	7282	gsC	A5
WSM1455	Pisum sativum	Greece	Reeve et al., 2015	GCA_000271805	755751	61	35	7116	gsB	B2
WSM1481	Pisum sativum	Greece	Reeve et al., 2015	GCA_000372305	755558	61	6	7114	gsB	B2
