# Supplementary material for: Genetic Variation in Host-Specific Competitiveness of the Symbiont Rhizobium leguminosarum Symbiovar viciae
Source: Front Plant Sci. 2021 Sep 8;12:719987. doi: 10.3389/fpls.2021.719987 (PMC8457355; doi:10.3389/fpls.2021.719987)
Supplement: Supplementary Table 2 — Primers used and PCR conditions for metabarcoding. [file Data_Sheet_2.xlsx]

## Sheet: Supplementary table S2
Supplementary table S2: Primers used and PCR conditions for metabarcoding.
Primers
Names	Orientations	Sequences
nodD309MiSeq_F1	Forward	CTTTCCCTACACGACGCTCTTCCGATCTCGCTTRGCTCGRGAGGC
nodD309MiSeq_R1	Reverse	GGAGTTCAGACGTGTGCTCTTCCGATCTCCTCTTGARGCCGTGCT
Miseq_round2_F	Forward	AATGATACGGCGACCACCGAGATCTACACTCTTTCCCTACACGAC
Miseq_round2_R	Reverse	CAAGCAGAAGACGGCATACGAGAT‐index‐ GTGACTGGAGTTCAGACGTGT
abpromnodA1	Forward	GGTCTCCAAATAAGAAGGTTGAGATCAAGGCC
abpromnodA2	Reverse	GGTCTCCGTAAGCAAAAGCTCCACGTTGTTG
bdnodxtom1	Forward	GGTCTCCTTACATGGGACCATCCAATGAACAC
Bdnodxtom2	Reverse	GGTCTCCTGTATTAAGCGACGGAAAGCCTTCT
Note: Illumina adapters for the second amplification round are indicated in bold
PCR conditions
Cycle Step	Temperature	Time	Cycles
Initial Denaturation	98°C	30s	1
Denaturation	98°C	10s	32
Annealing	57°C	30s
Extension	72°C	30s
Final extension	72°C	10min	1
For each reaction, 120ng of purified DNA was used in a final PCR reaction volume of 60µL

## Sheet: Supplementary table S3
Supplementary table S3: NodD309 sequences of the 32 rhizobia included in the Rlv core collection.
Bacteria	nodD309 barcode sequences
3841	GCCAGGAGTCAGCTTCGAGTTGCTGCCACTTGACGACGATCCGGAGGAGCTTCTCCGCCGTGGTGATGTCGATTTTCTGATCCTCCCGGACTTATTCATGTCCGGCGCCCATCCGAAGGCAAGGCTTTTCGAAGAGAGACTGGTGTGCGTCGGCTGCCCTACGAACGAGCAGTTACAAGGGCAGCTCTCCTTGGAGCAATATATGTCCATGGGACATGTTGCGGCTAAGTTCGGACGTGGTCTCAAGCCTTCCGTAGAGCAATGGCTATTGATGC
BLR195	GCCAGGGGTCAGCTTCGAGTTGCTGCCACTTGACGACGATCCGGAGGAGCTTCTCCGCCGTGGTGATGTCGATTTTCTGATCCTCCCGGATTTATTCATGTCCGGCGCCCATCCGAAGGCAAGGCTTTTCGAAGAGAAATTGGTGTGCGTCGGCTGCCCTACGAACGAGCAGTTACAAGGGCAGCTCTCCTTGGAGCAATATATGTCCATGGGACATGTTGCGGCTAAGTTCGGACGTGGTCTCAAGCCTTCCGTAGAGCAATGGCTATTGATGC
CCBAU03058	GCCAGGGGTCAGCTTCGAGTTGCTGCCACTTGACGACGATCCCGAGGAGCTTCTCCGCCGCGGGGATGTTGATTTTCTGATCCTACCCGATCTATTCATGTCTGGCGCCCATCCGAAGGCAAGGCTTTTCGAAGAGAGACTGGTGTGCGTCGGCTGCCCTACGAACGAGCAGTTGCAAGGGAAGCTCTCCCTGGAGCAATATATGTCCATGGGACATGTCGCGGCTAAGTTCGGACGTGGTCTTAAGCCTTCCGTTGAGCAATGGTTATTGCTGC
CCBAU10279	GCCAGGGGTCAGCTTCGAGTTGCTGCCACTTGACGACGATCCGGAGGAGCTTCTCCGCCGTGGGGATGTTGATTTTCTGATCCTTCCGGATTTATTCATGTCTGGCGCCCATCCGAAGGCAAGGCTTTTTGAAGAGGAACTGGTGTGTGTCGGCTGCCCTACGAACGAGCAGCTGCCAGGGAAGCTCTCTCTGGAGCAATATATGTCCATGGGGCATGTTGCGGCTAAGTTCGGACGTGGCCTTAAGCCTTCCGTTGAGCAATGGTTATTGCTGG
CCBAU11080	GCCGGGGGTCAGCTTCGAGTTGCTGCCGCTTGACGACGATCCGGAGGAGCTTCTCCGCCGTGGGGATGTTGATTTTCTGATCCTTCCGGATTTATTCATGTCTGGCGCCCATCCGAAAGCAAGGCTTTTCGAAGAGGAACTGGTGTGTGTCGGCTGCCCTACGAACGAGCAGCTGCCAGGGAAGCTCTCTCTGGAGCAATATATGTCCATGGGGCATGTTGCGGCTAAGTTCGGACGTGGTCTTAAGCCTTCTGTTGAGCAATGGTTATTGCTGG
CCBAU43229	GCCAGGGGTCAGCTTCGAGTTGCTGCCACTTGACGACGATCCGGAGGAGCTTCTACGCCGTGGTGATGTCGATTTTCTGATCCTCCCGGATTTATTCATGTCCGGCGCCCATCCGAAGGCAAGGCTTTTCGAAGAGAGACTGGTGTGCGTCGGCTGCCCTACGAACGAGCAGTTACAAGGGCAGCTCTCCTTGGAGCAATATATGTCCATGGGACATGTTGCGGCTAAGTTCGGACGTGGTCTTAAGCCTTCCGTAGAGCAATGGTTATTGATGC
CCBAU83268	GCCGGGGGTCAGCTTCGAGTTGCTGCCACTTGACGACGATCCGGAGGAGCTTCTCCGCCGTGGGGATGTTGATTTTCTGATCCTTCCGGATTTGTTCATGTCTGGCGCCCACCCAAAAGCAAGGCTTTTCGAAGAGGAACTGGTGTGTGTCGGCTGCCCTACGAACGAGCAGCTGCCAGGGAAGCTCTCCCTGGAGCAATATATGTCCATGGGGCATGTTGCGGCTAAGTTCGGACGTGGTCTTAAGCCTTCTGTTGAGCAATGGTTATTGCTGG
CZP1G9	GCCAGGGGTCAGCTTCGAGTTGCTGCCACTTGACGACGATCCCGAGGAGCTTCTCCGGCGCGGGGATGTTGATTTTCTGATCCTACCCGATCTATTCATGTCTGGCGCCCACCCGAAGGCAAGGCTTTTCGAAGAGAGACTGGTGTGCGTCGGCTGCTCTACGAACGAGCAGTTGCAAGGGAAGCTCTCCCTGGAGCAATATATGTCCATGGGACATGTTGCGGCTAAGTTCGGACGTGGTCTTAAGCCTTCCGTTGAGCAATGGTTATTGCTGC
CZP3G4	GCCAGGGGTCAGCTTCGAGTTGCTGCCACTTGACGACGATCCCGAGGAGCTTCTCCGCCGCGGGGATGTTGATTTTCTGATCCTACCCGATCTATTCATGTCTGGCGCCCATCCGAAGGCAAGGCTTTTCGAAGAGAGACTGGTGTGCGTCGGCTGCTCCACGAACGAGCAGTTGCAAGGGAAGCTCTCCCTGGAGCAATATATGTCCATGGGGCATGTTGCGGCTAAGTTCGGACGTGGTCTTAAGCCTTCCGTTGAGCAATGGTTATTGCTGC
CZP3H6	GCCAGGGGTCAGCTTCGAGTTGCTGCCACTTGACGACGATCCCGAGGAGCTTCTCCGCCGTGGGGATGTTGATTTTCTGATCCTACCCGATCTATTCATGTCTGGCGCCCATCCGAAGGCAAGGCTTTTCGAAGAGAGACTGGTGTGCGTCGGCTGCTCCACGAACGAGCAGTTGCAAGGGAAGCTCTCCCTGGAGCAATATATGTCCATGGGACATGTTGCGGCTAAGTTCGGACGTGGTCTTAAGCCTTCCGTTGAGCAATGGTTATTGCTGC
FRP3E11	GCCGGGGGTCAGCTTCGAGTTGCTGCCACTTGACGACGATCCTGAGGAGCTTCTCCGCCGTGGGGATGTTGATTTTCTGATCCTTCCGGATCTATTCATGTCTGGTGCCCATCCGAAGGCAAGGCTTTTCGAAGAGGAACTGGTGTGTGTCGGCTGCCCTACGAACGAGCAGCTGCCAGCGAAGCTCTCCCTGGAGCAATATATGTCCATGGGGCATGTTGCGGCTAAGTTCGGACGTGGTCTTAAGCCTTCTGTTGAGCAATGGTTATTGCTGG
FRP3G5	GCCAGGGGTCAGCTTCGAGTTGCTGCCACTTGACGACGATCCGGAGGAGCTTCTCCGCCGTGGTGATGTCGATTTTCTGATCCTCCCGGATTTATTCATGTCCGGCGCCCATCCGAAGGCAAGGCTTTTCGAAGAGAGACTGGTGTGCGTCGGCTGCCCTACGAACGAGCAGTTACAAGGGCAGCTCTCCTTGGAGCAATATATGTCCATGGGACATGTTGCGGCTAAGTTCGGACGTGGTCTTAAGCCTTCCGTAGAGCAATGGTTATTGATGC
FRP4D11	GCCAGGGGTCAGCTTCGAGTTGCTGCCACTTGACGACGATCCCGAGGAGCTTCTCCGCCGCGGGGATGTTGATTTTCTGATCCTACCCGATCTATTCATGTCTGGCGCCCATCCGAAGGCAAGGCTTTTCGAAGAGAGACTGGTGTGCGTCGGCTGCCCTACGAACGAGCAGTTGCAAGGGAAGCTCTCCCTGGAGCAATATATGTCCATGGGACATGTTGCGGCTAAGTTCGGACGTGGTCTTAAGCCTTCCGTTGAGCAATGGTTATTGCTGC
GB29	GCCAGGGGTCAGCTTCGAGTTGCTGCCACTTGACGACGATCCCGAGGAGCTTCTTCGCCGTGGGGATGTTGATTTTCTGATCCTACCCGATCTATTCATGTCTGGCGCCCATCCGAAGGCAAGGCTTTTCGAAGAGAGACTGGTGTGCGTCGGCTGCTCCACGAACGAGCAGTTGCAAGGGAAGCTCTCCCTGGAGCAATATATGTCCATGGGACATGTTGCGGCTAAGTTCGGACGTGGTCTTAAGCCTTCCGTTGAGCAATGGTTATTGCTGC
GB51	GCCAGGGGTCAGCTTCGAGTTGCTGCCACTTGACGACGATCCCGAGGAGCTTCTCCGGCGCGGGGATGTTGATTTTCTGATCCTACCCGATCTATTCATGTCTGGCGCCCACCCGAAGGCAAGGCTTTTCGAAGAGAGACTGGTGTGCGTCGGCTGCTCTACGAACGAGCAGTTGCAAGGGAAGCTCTCCCTGGAGCAATATATGTCCATGGGACATGTTGCGGCTAAGTTCGGACGTGGTCTTAAGCCTTCCGTTGAGCAGTGGTTATTGCTGC
GD25	GCCAGGGGTCAGCTTCGAGTTGCTGCCACTTGACGACGATCCCGAGGAGCTTCTCCGCCGCGGGGATGTTGATTTTCTGATCCTACCCGATCTATTCATGTCTGGCGCCCATCCGAAGGCAAGGCTTTTCGAAGAGAGACTGGCGTGCGTCGGCTGCTCCACGAACGAGCAGTTGCAAGGGAAGCTCTCCCTGGAGCAATATATGTCCATGGGACATGTTGCGGCTAAGTTCGGACGTGGTCTTAAGCCTTCCGTTGAGCAATGGTTATTGCTGC
GLR17	GCCAGGGGTCAGCTTCGAGTTGCTACCACTTGACGACGATCCCGAGGAGCTTCTCCGCCGTGGGGATGTCGATTTTCTGATCCTCCCAGATTTATTCATGTCCGGCGCCCATCCGAAGGCAAGGCTTTTCGAAGAGAGGCTGGTGTGCGTCGGCTGCCCTACGAACGAGCAGTTACAAGGGAAGCTCTCCTTGGAGCAATATATGTCTATGGGACATGTTGCGGCTAAGTTCGGACGTGGTCTTAAGCCTTCCGTAGAGCAATGGTTATTGATGC
GLR2	GCCGGGGGTCAGCTTCGAGTTGCTGCCGCTTGACGACGATCCGGAGGAGCTTCTCCGTCGCGGGGATGTTGATTTTCTGATCCTTCCCGATTTATTCATGTCTGGCGCCCATCCGAAGGCAAGGCTTTTCGAAGAGAGACTGGTGTGCGTCGGCTGCCCTACGAACGAGCAGTTGCAAGGGAAGCTCTCCCTGGAGCAATATATGTCCATGGGACATGTTGCGGCTAAGTTCGGACGTGGTCTTAAGCCTTCCGTTGAGCAATGGTTATTGCTGC
HP3	GCCAGGAGTCAGCTTCGAGTTGCTGCCACTTGACGACGATCCGGAGGAGCTTCTCCGCCGTGGTGATGTCGATTTTCTGATCCTCCCGGACTTATTCATGTCCGGCGCCCATCCGAAGGCAAGGCTCTTCGAAGAGAGACTGGTGTGCGTCGGCTGCCCTACGAACGAGCAGTTACAAGGGCAGCTCTCCTTGGAGCAATATATGTCCATGGGACATGTTGCGGCTAAGTTCGGACGTGGTCTCAAGCCTTCCGTAGAGCAATGGCTATTGATGC
IAUb11	GCCAGGGGTCAGCTTCGAGTTGCTGCCACTTGACGACGATCCCGAGGAGCTTCTCCGCCGCGGGGATGTTGATTTTCTGATCCTTCCCGATCTATTCATGTCTGGCGCCCATCCGAAGGCAAGGCTTTTCGAAGAGAGACTGGTGTGCGTCGGCTGCCCTACAAACGCGCAGTTGCAAGGGAAGCTCTCCCTGGAGCAATATATGTCCATGGGACATGTTGCGGCTAAGTTCGGACGTGGTCTTAAGCCTTCCGTTGAGCAATGGTTATTGCTGC
L113	GCCAGGGGTCAGCTTCGAGTTGCTGCCACTTGACGACGATCCCGAGGAGCTTCTCCGCCGCGGGGATGTTGATTTTCTGATCCTACCCGATCTATTCATGTCTGGCGCCCATCCGAAGGCAAGGCTTTTCGAAGAGAGACTGGTGTGCGTCGGCTGCTCGACGAACGAGCAGTTGCAAGGGAAGCTCTCCCTGGAGCAATATATGTCCATGGGACATGTTGCGGCTAAGTTCGGACGTGGTCTTAAGCCTTCCGTTGAGCAATGGTTATTGCTGC
L125	GCCAGGGGTCACCTTCGAGTTGCTGCCACTTGACGACGATCCCGAGGAGCTTCTCCGCCGCGGGGATGTTGATTTTCTGATCCTACCCGATCTATTCATGTCTGGCGCCCATCCGAAGGCAAGGCTTTTCGAAGAGAGACTGGTGTGCGTCGGCTGCTCTACGAACGAGCAGTTGCAAGGGAAGCTCTCCCTGGAGCAATATATGTCCATGGGACATGTTGCGGCTAAGTTCGGACGTGGTCTTAAGCCTTCCGTTGAGCAATGGTTATTGCTGC
L411	GCCAGGGGTCAGCTTCGAGTTGCTGCCACTTGACGACGATCCCGAGGAGCTTCTCCGCCGCGGGGATGTTGATTTTCTGATCCTACCCGATCTATTCATGTCTGGCGTCCATCCGAAGGCAAGGCTTTTCGAAGAGAGACTGGTGTGCGTCGGCTGCCCTACGAACGAGCAGTTGCAAGGGAAGCTCTCCCTGGAGCAATATATGTCCATGGGACATGTTGCGGCTAAGTTCGGACGTGGTCTTAAGCCTTCCGTTGAGCAATGGTTATTGCTGC
Lp8	GCCAGGGGTCAGCTTCGAGTTGCTGCCACTTGACGACGATCCCGAGGAGCTTCTCCGCCGCGGGGATGTTGATTTTCTGATCCTACCCGATCTATTCATGTCTGGCGCCCATCCGAAGGCAAGGCTTTTCGAAGAGAGACTGGTGTGCGTCGGCTGCTCCACGAACGAGCAGTTGCAAGGGAAGCTCTCCCTGGAGCAATATATGTCCATGGGACATGTTGCGGCTAAGTTCGGACGTGGTCTTAAGCCTTCCGTGGAGCAATGGTTATTGCTGC
OS25	GCCAGGGGTCAGCTTCGAGTTGCTGCCACTTGACGACGATCCGGAGGAGCTTCTCCGCCGTGGTGATGTCGATTTTCTGATCCTCCCGGATTTATTCATGTCCGGCGCCCATCCGAAGGCAAGGCTTTTCGAAGAGAGACTGGTGTGCGTCGGCTGCCCTACGAACGAGCAGTTACAAGGGCAGCTCTCCTTGGAGCAATATATGTCCATGGGACATGTTGCGGCTAAGTTCGGACGTGGTCTCAAGCCTTCCGTAGAGCAATGGCTATTGATGC
P1NP2H	GCCAGGGGTCAGCTTCGAGTTGCTGCCACTTGACGACGATCCCGAGGAGCTTCTCCGCCGCGGGGATGTTGATTTTCTGATCCTACCCGATCTATTCATGTCTGGCGCCCATCCGAAGGCAAGGCTTTTCGAAGAGAGACTGGTGTGCGTCGGCTGCTCCACGAACGAGCAGTTGCAAGGGAAGCTCTCCCTGGAGCAATATATGTCCATGGGACATGTTGCGGCTAAGTTCGGACGTGGTCTTAAGCCTTCCGTTGAGCAATGGTTATTGCTGC
P1NP2K	GCCAGGGGTCAGCTTCGAGTTGCTGCCACTTGACGACGATCCCGAGGAGCTTCTCCGCCGCGGGGACGTGGATTTTCTGATCCTACCCGATCTATTCATGTCCGGCGCCCATCCGAAGGCAAGGCTTTTCGAAGAGAGACTGGTGTGCGTCGGCTGCCCTACGAACGAGCAGTTGCAAGGGAAGCTCTCCCTGGAGCAATATATGTCCATGGGACATGTTGCGGCTAAGTTCGGACGTGGTCTTAAGCCTTCCGTTGAGCAATGGTTATTGCTGC
P221	GCCAGGGGTCAGCTTCGAGTTGCTGCCACTTGACGACGATCCCGAGGAGCTTCTCCGCCGCGGGGATGTTGATTTTCTGATCCTACCCGATCTATTCATGTCTGGCGCCCATCCGAAGGCAAGGCTTTTCGAAGAGAGACTGGTGTGCGTCGGCTGCTCCACGAACGAGCAGTTGCAAGGGAAGCTCTCCCTGGAGCAATATATGTCCATGGGACATGTTGCGGCTAAGTTCGGACGTGGTCTTAAGCCATCCGTTGAGCAATGGTTATTGCTGC
SEF5C12	GCCAGGGGTCAGCTTCGAGTTGCTGCCACTTGACGACGATCCCGAGGAGCTTCTCCGCCGTGGGGATGTTGATTTTCTGATCCTACCCGATCTATTCATGTCTGGCGCCCATCCGAAGGCAAGGCTTTTCGAAGAGAGACTGGTGTGCGTCGGCTGCTCCACGAACGAGCAGTTGCAGGGGAAGCTCTCCCTGGAGCAATATATGTCCATGGGACATGTTGCGGCTAAGTTCGGACGTGGTCTTAAGCCTTCCGTTGAGCAATGGTTATTGCTGC
SL16	GCCAGGGGTCAGCTTCGAGTTGTTGCCACTTGACGACGATCCGGAGGAGCTTCTCCGCCGTGGTGACGTCGATTTTCTGATCCTCCCGGATTTATTCATGTCCGGCGCCCATCCGAAGGCAAGGCTTTTCGAAGAGAGACTGGTGTGCGTCGGCTGCCCTACGAACGAGCAGTTACAAGGGCAGCTCTCCTTGGAGCAATATATGTCCATGGGACATGTTGCGGCTAAGTTCGGACGTGGTCTTAAGCCTTCCGTAGAGCAATGGTTATTGATGC
TOM	GCCGGGGGTCAGCTTCGAGTTGCTGCCACTTGACGACGATCCGGAGGAGCTTCTCCGCCGTGGGGATGTTGATTTTCTGATCCTTCCGGATTTATTCATGTCTGGCGCCCACCCAAAAGCAAGGCTTTTCGAAGAGGAACTGGTGTGTGTCGGCTGCTCTACGAACGAGCAACTGCCAGTGAAGCTCTCGCTGGAGCAATATATGTCCATGGGGCATGTTGCGGCTAAGTTCGGACGTGGTCTGAAGCCCTCTGTTGAGCAATGGTTATTGCTGG
UPM1134	GCCTGGGGTCAGCTTCGAGTTGCTGCCACTTGACGACGATCCCGAGGAGCTTCTCCGGCGCGGGGATGTTGATTTTCTGATCCTTCCGGATTTATTCATGTCTGGCGCCCATCCGAAAGCAAGGCTTTTCGAAGAGAGACTGGTGTGCGTCGGCTGCTTTACGAACGAGCAGCTGCAAGGGAAGCTCTCCCTGGAGCAATATATGTCCATGGGGCATGTTGCGGCTAAGTTCGGACGTGGTCTTAAGCCTTCCGTTGAGCAATGGTTATTGATGC
Note: Sequences represent the 275 nucleotides between the two primers nod309_Miseq primers used to discriminate each of the 32 bacteria in the mixture

## Sheet: Supplementary table S4
Supplementary table S4: Read numbers in each sample after quality filtering.
Pisum sativum cv. Kayanne (PK); Pisum sativum cv. Isard (PI); Pisum sativum cv. Afghanistan JI1357 (PJ); Lens culinaris cv. Flora (LF); Lens culinaris cv. Rosana (LR); Lens culinaris cv. Anicia (LA); Vicia faba cv. Organdi (FO); Vicia faba cv. Diva (FD); Vicia faba cv. Tiffany (FT)
	P K pot1	P K pot2	P K pot3	P K pot4	P I pot1	P I pot2	P I pot3	P I pot4	P J pot1	P J pot2	P J pot3	P J pot4	L F pot1	L F pot2	L F pot3	L F pot4	L R pot1	L R pot2	L R pot3	L R pot4	L A pot1	L A pot2	L A pot3	L A pot4	F O pot1	F O pot2	F O pot3	F O pot4	F D pot1	F D pot2	F D pot3	F D pot4	F T pot1	F T pot2	F T pot3	F T pot4
CZP3G4	568	1148	1163	1694	1013	794	1219	386	103	86	46	71	74	46	75	70	209	99	97	124	169	129	152	116	289	249	474	229	134	125	179	121	232	226	127	272
P1NP2H	2593	2297	2561	3273	7330	591	4713	2176	393	112	125	177	1032	871	546	375	1941	809	658	1309	1750	1891	1442	1519	318	296	333	312	175	182	318	218	301	336	221	344
FRP4D11	558	418	293	151	2617	1185	2763	1308	120	29	61	55	777	1172	819	586	725	728	646	459	669	768	571	926	305	239	990	1089	95	200	1612	67	1155	525	803	452
CZP1G9	1944	566	1032	1715	7472	1152	6987	2528	163	44	38	51	28	116	697	25	423	80	134	228	78	582	104	392	27	21	39	32	25	17	31	103	23	69	7	41
Rlv3841	359	1526	545	546	3463	6813	4017	2205	338	81	143	168	1711	1046	1918	763	1393	1745	636	1016	496	910	1675	786	10122	10361	7385	7755	11836	11324	9529	13247	9416	11128	11566	9976
BLR195	470	307	518	246	5	1	8	3	8737	8243	8613	8885	8	265	1	327	785	86	202	1130	70	155	21	44	10	12	3	8	14	9	15	11	54	5	3	8
GB-51	5	457	68	16	1208	11	2664	461	64	20	13	9	1	3	20	0	103	5	72	3	4	348	3	13	24	7	8	25	15	17	19	17	13	12	8	4
CCBAU43229	101	16	60	341	416	131	245	271	24	31	34	24	20	32	57	54	51	93	66	92	142	79	158	134	644	832	223	824	953	290	309	335	616	81	26	46
UPM1134	5	15	5	6	847	84	404	34	30	15	10	8	1	2	12	5	99	4	5	44	310	38	3	11	35	37	41	28	26	34	24	37	43	5	13	16
FRP3G5	230	50	105	83	1090	46	361	162	106	30	61	61	193	257	458	468	523	1040	461	511	650	715	777	742	171	198	137	209	193	82	78	111	133	32	31	22
P221	952	432	125	768	2462	23	98	558	28	22	18	20	206	26	8	2	53	69	214	95	77	415	445	216	17	18	30	44	9	15	17	51	15	24	14	24
IAUb11	22	110	103	30	619	30	1534	1003	147	13	8	5	2	28	23	0	1092	5	18	8	430	880	719	28	14	20	13	14	5	14	13	23	35	9	10	14
CCBAU11080	139	120	222	102	16	0	12	2	1976	3244	2903	2604	236	149	232	440	350	151	379	454	196	232	149	98	4	4	8	0	0	8	8	18	8	10	10	2
Lp8	727	766	749	482	1932	546	1346	418	119	32	31	49	88	11	44	38	521	97	191	530	562	32	25	192	280	130	131	145	114	113	136	104	103	60	91	105
OS25	22	23	26	15	178	19	65	37	168	92	128	126	85	317	93	86	413	554	314	274	196	158	146	158	69	76	51	79	67	46	46	42	59	20	13	17
GB-29	82	120	41	43	319	16	25	70	9	14	7	4	2	19	1	2	1	2	0	3	2	273	0	3	42	32	64	49	37	34	39	35	69	105	75	176
P1NP2K	11	21	18	19	544	217	997	675	75	7	95	72	1466	1968	321	1398	429	879	1708	539	1175	774	608	1522	20	16	19	15	9	4	20	32	13	24	7	17
CCBAU10279	111	168	123	70	6	2	16	2	1674	1570	945	1220	501	294	312	536	503	699	729	499	499	401	493	664	10	14	49	27	10	16	18	39	29	12	12	6
L125	916	2110	1279	1954	1829	36	1127	374	212	121	103	152	168	256	783	547	1025	1838	776	1772	1694	2454	1132	1892	468	541	440	376	399	232	494	216	551	879	527	900
L113	2867	3612	3881	4373	2978	494	1011	286	254	53	56	101	393	14	52	223	802	373	84	810	1007	727	1106	1117	473	342	920	713	224	211	417	254	233	265	167	306
GLR2	235	86	69	28	318	99	207	178	181	7	174	131	3825	4137	2220	2915	1297	1507	3686	1046	1032	453	523	1395	22	13	32	31	16	15	25	55	20	6	18	12
SL16	6	15	63	18	12	1	24	2	12	2	24	26	57	137	550	285	123	326	558	383	890	431	602	23	11	16	174	13	8	5	11	9	7	6	5	8
GLR17	17	24	9	3	14	0	13	3	28	8	31	29	1349	863	1857	2151	115	229	631	188	338	234	104	794	45	42	82	136	26	10	31	49	43	50	19	58
TOM	0	0	0	0	1	0	0	0	2	0	0	0	0	0	3	0	0	0	0	0	0	7	0	0	0	0	0	1	1	0	0	0	0	0	0	0
FRP3E11	2	1	3	1	2	31	34	0	9	4	2	2	19	0	5	6	37	24	23	27	34	29	0	18	49	2	2	2	2	2	2	2	6	0	2	8
CCBAU83268	2	12	16	12	3	1	3	1	72	333	256	233	65	0	131	34	80	66	42	35	26	25	0	65	0	0	5	0	0	1	1	4	0	0	0	2
Total/sample	12944	14420	13077	15989	36694	12323	29893	13143	15044	14213	13925	14283	12307	12029	11238	11336	13093	11508	12330	11579	12496	13140	10958	12868	13469	13518	11653	12156	14393	13006	13392	15200	13177	13889	13775	12836
Mean/sample	14202.6
SD/sample	4905.28
Total experiment	511294

## Sheet: Supplementary table S5
Supplementary table S5: EPC indexes for each of the plant/rhizobia pairs
	PK	PI	PJ	LF	LR	LA	FO	FD	FT	max EPC index per bacterium	min EPC index per bacterium	median EPC index per bacterium	mean EPC index per bacterium
CZP3G4	8	4.1	0.5	0.6	1.1	1.2	2.5	1	1.6	8	0.5	1.2	2.2
P1NP2H	19	14.3	1.4	5.9	9.6	13.3	2.5	1.6	2.2	19	1.4	5.9	7.7
FRP4D11	2.6	9	0.5	7.1	5.3	5.9	5.4	3.7	5.5	9	0.5	5.4	5
CZP1G9	9.4	18.1	0.5	1.9	1.7	2.3	0.2	0.3	0.3	18.1	0.2	1.7	3.8
Rlv3841	5.2	23.7	1.3	11.6	9.9	8.1	69.7	81.9	78.3	81.9	1.3	11.6	32.2
BLR195	2.8	0	60	1.3	4.5	0.6	0.1	0.1	0.1	60	0	0.6	7.7
FRP3G5	0.9	1.4	0.4	3	5.3	5.9	1.4	0.8	0.4	5.9	0.4	1.4	2.2
CCBAU11080	1.1	0	18.8	2.3	2.7	1.4	0	0.1	0.1	18.8	0	1.1	2.9
Lp8	4.9	4.3	0.4	0.4	2.7	1.6	1.3	0.8	0.7	4.9	0.4	1.3	1.9
P1NP2K	0.1	2.9	0.4	10.9	7.4	8.2	0.1	0.1	0.1	10.9	0.1	0.4	3.4
CCBAU10279	0.9	0	9.4	3.5	5	4.2	0.2	0.1	0.1	9.4	0	0.9	2.6
L125	10.9	3	1	3.8	11.3	14.3	3.6	2.4	5.3	14.3	1	3.8	6.2
L113	26.1	4.4	0.8	1.4	4.3	8.1	5	2	1.8	26.1	0.8	4.3	6
GLR2	0.8	0.9	0.9	27.7	15.5	6.8	0.2	0.2	0.1	27.7	0.1	0.9	5.9
GLR17	0.1	0	0.2	13.4	2.4	2.9	0.6	0.2	0.3	13.4	0	0.3	2.2
P221	4	2.9	0.2	0.5	0.9	2.4	0.2	0.2	0.1	4	0.1	0.5	1.3
IAUb11	0.5	3.7	0.3	0.1	2.2	4.2	0.1	0.1	0.1	4.2	0.1	0.3	1.3
GB-51	1	3.9	0.2	0.1	0.4	0.7	0.1	0.1	0.1	3.9	0.1	0.2	0.7
CCBAU43229	0.9	1.3	0.2	0.4	0.6	1.1	4.9	3.3	1.4	4.9	0.2	1.1	1.6
SL16	0.2	0	0.1	2.3	2.9	4	0.4	0.1	0	4	0	0.2	1.1
UPM1134	0.1	1.2	0.1	0	0.3	0.7	0.3	0.2	0.1	0.7	0	0.2	0.3
TOM	0	0	0	0	0	0	0	0	0	0	0	0	0
GB-29	0.5	0.4	0.1	0.1	0	0.5	0.4	0.3	0.8	0.8	0	0.4	0.3
OS25	0.2	0.3	0.9	1.2	1.2	1.3	0.5	0.4	0.2	1.2	0.2	0.5	0.7
FRP3E11	0	0.1	0	0.1	0.2	0.2	0.1	0	0	0.2	0	0.1	0.1
CCBAU83268	0.1	0	1.6	0.5	0.5	0.2	0	0	0	1.6	0	0.1	0.3
max EPC index per plant genotype	26.1	23.7	60	27.7	15.5	14.3	69.7	81.9	78.3
min CFN per plant genotype	0	0	0	0	0	0	0	0	0
median EPC index per plant	0.9	1.4	0.5	1.4	2.6	2.4	0.4	0.2	0.2
mean EPC index per plant	3.9	3.8	3.9	3.9	3.8	3.9	3.8	3.8	3.8
Not detected	PK	PI	PJ	LF	LR	LA	FO	FD	FT
CCBAU03058	NA	NA	NA	NA	NA	NA	NA	NA	NA
CZP3H6	NA	NA	NA	NA	NA	NA	NA	NA	NA
GD-25	NA	NA	NA	NA	NA	NA	NA	NA	NA
L411	NA	NA	NA	NA	NA	NA	NA	NA	NA
HP3	NA	NA	NA	NA	NA	NA	NA	NA	NA
SEF5C12	NA	NA	NA	NA	NA	NA	NA	NA	NA
note

## Sheet: Supplementary table S6
Supplementary table S6: Genospecies and Nod group combinations in the initial rhizobial collection and within the core-collection
Genospecies/ Nod groups	gsB	gsC	gsD	gsE	gsG	gsN	gsO	gsQ	gsR	Rhizobium binae	Rhizobium anhuiense	Rhizobium pisi	Strain SEF4G12
A1	2	15(3)		19(4)		1						1(1)
A2	1	1				2
A3	2(1)			5(1)		2		1
A4	2(1)	1(1)	1	6(3)
A5		2(1)	1				1
B1	2(1)	2		10		3		1	4				1
B2	2							1	1(1)
B3				2(1)	1	1			6(2)		1(1)
B4				1(1)		5	1(1)	3(2)	1	1(1)
B5	2(1)				1(1)	2(2)			1(1)
Note: the number of strains corresponding to each genospecies/Nod group combination is indicated. Number of strains included in the core collection for each combination is indicated in parentheses.

## Sheet: Supplementary table S7
Supplementary table S7: Clusters of Rlv bacteria of the core collection, gathered on the basis of the EPC profiles of the Figure 3
	Cluster 1 (n=2)	Cluster 2 (n=7)	Cluster 3 (n=11)	Cluster 4 (n=6)
Rlv bacteria	CZP3G4	FRP3G5	CZP1G9	CCBAU83268
	CCBAU43229	Lp8	P221	TOM
		3841	GLR2	FRP3E11
		P1NP2H	GLR17	GB29
		L125	SL16	GB51
		FRP4D11	P1NP2K	UPM1134
		L113	IAUb11
			OS25
			BLR195
			CCBAU11080
			CCBAU10279
Genospecies	50% R. pisi ; 50% R. anhuiense	57% gsE ; 29% gsB ; 14% gsC	27% gsE ; 22.5% gsR; 22.5% gsQ ; 9% gsB ; 9% gsG ; 9% R. binae	33% gsE ; 33% gsN ; 33% gsC
Nod types	50% A ; 50% B	71% A ; 29% B	64% B; 36% A	50% A ; 50% B
Nod groups	50% A1 ; 50% B3	29% A1 ; 29% A4 ; 14% A3 ; 14% B3 ; 14% B1	27% B4 ; 18% B5 ; 18% A4 ; 18% B3 ; 9% A1; 9% A3	33% A1 ; 33% B5 ; 17% B4 ; 17% A5

## Sheet: Supplementary table S8
Supplementary table S8: Average Nucleotide Identity (ANI) between each pairs of the 121 genomes of Rlv, as well as Sinorhizobium meliloti Sm1021, Rl sv trifoli WSM1689 and Rl sv phaseoli Rlp4292
ANIm	248	3841	4292	128C53	BIHB1217	BLR195	CCBAU03058	CCBAU10279	CCBAU11080	CCBAU33195	CCBAU43229	CCBAU65264	CCBAU83268	CL8	CZF1B5	CZF1F8	CZF5B4	CZF5G8	CZP1G1	CZP1G4	CZP1G9	CZP1H7	CZP2D2	CZP2H1	CZP3C9	CZP3G4	CZP3G7	CZP3H6	CZP3H7	ESF2A11	FRF1A1	FRF1D12	FRF1H7	FRF3E2	FRP2D7	FRP3A12	FRP3E11	FRP3E5	FRP3G5	FRP4D11	FRP4H3	FRP5A4	FRP5C5	FRP5D3	FRP5H7	GB29	GB30	GB51	GD25
248	100	94.6	92.66	92.67	92.69	88.27	94.43	95.31	93.59	93.58	91.04	94.45	94.87	95.5	93.25	92.77	93.25	93.24	92.68	92.66	92.68	92.68	93.22	93.23	92.68	89.01	92.76	93.19	92.66	96.1	92.72	95.01	93.22	92.72	92.72	92.74	92.7	92.73	92.73	92.68	92.79	92.72	92.79	92.65	92.64	93.18	93.23	92.65	92.67
3841	94.6	100	92.95	93.03	93.02	88.3	98.32	94.33	93.73	93.77	91.19	98.44	94.44	94.3	93.74	93.06	93.76	93.72	93.06	92.96	93.06	93.05	93.73	93.75	93.05	89.16	93.06	93.72	92.97	94.43	93.05	94.6	93.8	92.99	93.03	93.03	93	93	93.02	92.98	93.22	92.98	93.2	92.98	92.98	93.7	93.74	92.96	92.97
4292	92.66	92.94	100	99.82	99.89	88.08	92.86	92.49	92.62	92.57	91.51	92.93	92.63	92.47	93.47	99.91	93.48	93.48	99.77	99.9	99.73	99.74	93.48	93.46	99.89	88.99	99.91	93.45	98.97	92.52	98.36	92.65	93.43	98.37	98.6	98.53	99.89	99.88	98.47	99.86	99.87	98.43	99.91	99.88	99.89	93.49	93.46	98.24	98.26
128C53	92.69	93.04	99.83	100	99.72	88.28	92.94	92.48	92.65	92.61	91.56	92.93	92.73	92.48	93.47	99.78	93.49	93.49	99.65	99.74	99.82	99.82	93.48	93.46	99.72	89.38	99.79	93.45	98.84	92.55	98.3	92.69	93.43	98.3	98.44	98.39	99.76	99.75	98.24	99.74	99.7	98.36	99.77	99.69	99.69	93.48	93.46	98.28	98.25
BIHB1217	92.7	93.03	99.88	99.72	100	88.29	92.92	92.49	92.65	92.62	91.6	92.95	92.73	92.47	93.47	99.87	93.49	93.49	99.67	99.78	99.59	99.62	93.49	93.47	99.69	89.41	99.87	93.48	98.86	92.54	98.29	92.71	93.47	98.3	98.52	98.4	99.78	99.75	98.32	99.8	99.67	98.36	99.78	99.86	99.79	93.49	93.47	98.18	98.19
BLR195	88.25	88.29	88.06	88.26	88.27	100	88.35	88.12	88.23	88.28	88.53	88.26	88.21	88.14	88.24	88.14	88.25	88.2	88.28	88.21	88.27	88.26	88.19	88.21	88.25	88.2	88.14	88.19	88.21	88.17	88.14	88.21	88.27	88.14	88.14	88.15	88.12	88.12	88.37	88.2	88.19	88.14	88.13	88.21	88.21	88.18	88.21	88.26	88.25
CCBAU03058	94.45	98.32	92.84	92.93	92.9	88.37	100	94.25	94.08	93.73	91.16	99.31	94.44	94.24	93.69	92.9	93.72	93.7	92.99	92.89	93.02	93.01	93.69	93.7	92.87	89.15	92.9	93.67	92.89	94.31	92.83	94.44	93.74	92.83	92.9	92.88	92.87	92.86	92.9	92.95	92.92	92.82	92.89	92.92	92.93	93.66	93.69	92.9	92.91
CCBAU10279	95.32	94.35	92.47	92.48	92.47	88.13	94.25	100	93.53	93.52	90.91	94.34	95.41	96.35	93.01	92.5	93.03	93.01	92.49	92.49	92.46	92.48	93.02	93.01	92.52	88.84	92.5	92.99	92.5	95.73	92.5	95.43	93.02	92.49	92.54	92.52	92.49	92.5	92.49	92.49	92.48	92.49	92.49	92.49	92.49	92.99	93	92.49	92.52
CCBAU11080	93.61	93.74	92.63	92.65	92.67	88.25	94.09	93.53	100	98.53	91.18	94.1	93.93	93.53	92.73	92.65	92.77	92.75	92.7	92.63	92.81	92.81	92.75	92.75	92.64	89.15	92.65	92.73	92.63	93.54	92.58	93.85	92.76	92.58	92.65	92.63	92.61	92.61	92.67	92.67	92.66	92.57	92.64	92.64	92.67	92.74	92.76	92.64	92.62
CCBAU33195	93.58	93.76	92.56	92.59	92.6	88.29	93.72	93.52	98.53	100	91.43	93.75	93.75	93.56	92.77	92.6	92.75	92.74	92.6	92.62	92.59	92.59	92.73	92.73	92.59	89.02	92.61	92.71	92.6	93.56	92.54	93.81	92.75	92.53	92.61	92.63	92.57	92.6	92.69	92.63	92.6	92.52	92.6	92.61	92.6	92.72	92.75	92.61	92.57
CCBAU43229	91.05	91.19	91.49	91.56	91.58	88.55	91.15	90.9	91.16	91.42	100	91.16	91	90.93	91.35	91.56	91.38	91.35	91.59	91.56	91.51	91.51	91.31	91.34	91.54	89.4	91.56	91.31	91.52	91	91.5	91.01	91.34	91.49	91.54	91.55	91.54	91.55	91.6	91.56	91.52	91.48	91.53	91.57	91.59	91.29	91.34	91.56	91.55
CCBAU65264	94.45	98.44	92.93	92.92	92.94	88.27	99.29	94.32	94.08	93.76	91.16	100	94.54	94.29	93.71	92.94	93.74	93.73	93	92.93	93.03	93.03	93.72	93.73	92.93	89.13	92.94	93.69	92.93	94.36	92.9	94.54	93.78	92.9	92.96	92.95	92.91	92.91	92.95	92.97	92.95	92.89	92.95	92.94	92.97	93.67	93.72	92.92	92.95
CCBAU83268	94.87	94.45	92.63	92.73	92.71	88.22	94.44	95.4	93.93	93.76	91	94.54	100	95.3	93.08	92.67	93.11	93.1	92.8	92.65	92.69	92.71	93.1	93.09	92.7	89.18	92.67	93.08	92.67	95.02	92.64	97.56	93.12	92.63	92.67	92.65	92.66	92.65	92.65	92.71	92.65	92.62	92.62	92.68	92.75	93.08	93.07	92.67	92.66
CL8	95.5	94.3	92.46	92.47	92.44	88.15	94.22	96.34	93.53	93.57	90.93	94.29	95.3	100	93.01	92.5	93.03	93.01	92.47	92.48	92.44	92.46	93.02	93.01	92.47	88.86	92.5	92.99	92.5	96.71	92.51	95.35	93	92.5	92.56	92.55	92.51	92.53	92.5	92.48	92.49	92.49	92.48	92.47	92.46	92.99	93	92.48	92.49
CZF1B5	93.26	93.75	93.48	93.46	93.48	88.25	93.68	93.01	92.73	92.78	91.37	93.72	93.09	93.01	100	93.51	99.47	99.45	93.49	93.51	93.46	93.46	98.99	99.23	93.5	89.19	93.51	98.98	93.5	93.11	93.48	93.19	96.88	93.48	93.51	93.52	93.48	93.5	93.5	93.49	93.49	93.48	93.5	93.48	93.47	99.18	99.68	93.47	93.5
CZF1F8	92.78	93.06	99.9	99.77	99.85	88.16	92.89	92.51	92.64	92.62	91.58	92.95	92.65	92.51	93.51	100	93.5	93.5	99.73	99.85	99.68	99.68	93.5	93.48	99.84	89.03	99.95	93.49	98.96	92.64	98.41	92.77	93.47	98.42	98.61	98.55	99.88	99.89	98.45	99.84	99.86	98.48	99.92	99.85	99.86	93.51	93.47	98.22	98.21
CZF5B4	93.25	93.76	93.49	93.48	93.49	88.26	93.71	93.02	92.76	92.76	91.39	93.76	93.11	93.03	99.48	93.5	100	99.87	93.5	93.5	93.48	93.48	99.06	99.21	93.51	89.19	93.51	98.92	93.52	93.12	93.53	93.18	96.95	93.53	93.58	93.58	93.49	93.49	93.57	93.56	93.49	93.53	93.49	93.5	93.49	99.26	99.39	93.49	93.51
CZF5G8	93.25	93.73	93.49	93.48	93.5	88.21	93.69	93.02	92.75	92.75	91.37	93.74	93.1	93.02	99.45	93.51	99.87	100	93.5	93.5	93.48	93.48	99.04	99.21	93.51	89.16	93.51	98.91	93.52	93.1	93.52	93.17	96.94	93.52	93.58	93.58	93.49	93.5	93.56	93.56	93.49	93.52	93.49	93.5	93.5	99.25	99.37	93.5	93.51
CZP1G1	92.69	93.06	99.79	99.66	99.69	88.3	92.98	92.49	92.71	92.63	91.6	93.01	92.79	92.49	93.48	99.76	93.5	93.5	100	99.71	99.61	99.62	93.49	93.47	99.65	89.65	99.76	93.48	98.8	92.56	98.28	92.7	93.46	98.28	98.41	98.35	99.75	99.73	98.32	99.71	99.65	98.33	99.73	99.68	99.71	93.5	93.47	98.21	98.2
CZP1G4	92.67	92.96	99.9	99.74	99.78	88.24	92.89	92.48	92.64	92.63	91.57	92.94	92.65	92.49	93.51	99.87	93.5	93.5	99.7	100	99.67	99.68	93.5	93.48	99.86	89.25	99.87	93.49	98.96	92.56	98.39	92.67	93.47	98.39	98.56	98.48	99.87	99.86	98.33	99.77	99.76	98.46	99.84	99.78	99.85	93.5	93.47	98.18	98.26
CZP1G9	92.7	93.06	99.74	99.82	99.57	88.28	93.03	92.5	92.8	92.61	91.54	93.04	92.72	92.47	93.46	99.7	93.48	93.48	99.6	99.66	100	99.86	93.48	93.46	99.6	89.36	99.7	93.47	98.84	92.55	98.2	92.7	93.43	98.22	98.43	98.29	99.6	99.6	98.33	99.62	99.52	98.26	99.64	99.59	99.61	93.49	93.45	98.29	98.22
CZP1H7	92.7	93.05	99.74	99.85	99.62	88.28	93.01	92.49	92.81	92.62	91.53	93.04	92.7	92.47	93.47	99.7	93.48	93.48	99.61	99.68	99.88	100	93.48	93.46	99.61	89.36	99.71	93.46	98.83	92.54	98.22	92.68	93.44	98.24	98.45	98.32	99.65	99.63	98.32	99.66	99.54	98.28	99.69	99.64	99.65	93.49	93.46	98.3	98.22
CZP2D2	93.22	93.74	93.48	93.47	93.49	88.21	93.69	93.01	92.74	92.73	91.32	93.73	93.1	93.02	98.99	93.5	99.05	99.03	93.49	93.49	93.47	93.48	100	98.98	93.51	89.18	93.5	98.96	93.51	93.09	93.52	93.19	96.87	93.52	93.57	93.56	93.48	93.49	93.56	93.55	93.48	93.52	93.48	93.49	93.48	99.11	99.01	93.48	93.51
CZP2H1	93.24	93.76	93.46	93.45	93.47	88.22	93.7	93.01	92.74	92.73	91.35	93.74	93.09	93.02	99.23	93.48	99.2	99.2	93.47	93.48	93.46	93.46	98.99	100	93.5	89.18	93.48	98.92	93.51	93.09	93.45	93.16	96.91	93.44	93.48	93.48	93.46	93.47	93.47	93.47	93.46	93.45	93.46	93.47	93.47	99.11	99.28	93.47	93.5
CZP3C9	92.69	93.05	99.9	99.71	99.69	88.27	92.86	92.52	92.64	92.6	91.55	92.93	92.7	92.49	93.49	99.85	93.51	93.51	99.63	99.85	99.59	99.6	93.5	93.49	100	89.32	99.85	93.5	99.03	92.55	98.34	92.7	93.48	98.33	98.54	98.42	99.79	99.78	98.32	99.7	99.67	98.39	99.81	99.7	99.75	93.5	93.48	98.15	98.21
CZP3G4	89.01	89.15	88.97	89.38	89.39	88.2	89.15	88.84	89.14	89.02	89.39	89.13	89.17	88.84	89.18	89.02	89.19	89.16	89.64	89.24	89.34	89.34	89.17	89.17	89.31	100	89.03	89.14	89.18	88.87	89.03	88.94	89.14	89.03	89.03	89.03	89.03	89.03	89.13	89.17	89.1	89.03	89.03	89.22	89.46	89.14	89.18	89.29	89.3
CZP3G7	92.77	93.06	99.9	99.77	99.85	88.16	92.89	92.51	92.65	92.62	91.56	92.95	92.66	92.51	93.51	99.95	93.5	93.5	99.73	99.86	99.68	99.69	93.5	93.48	99.85	89.04	100	93.49	98.96	92.64	98.41	92.77	93.46	98.42	98.61	98.55	99.88	99.89	98.45	99.84	99.86	98.48	99.93	99.85	99.86	93.51	93.48	98.22	98.22
CZP3H6	93.19	93.73	93.46	93.45	93.49	88.22	93.67	93	92.72	92.72	91.32	93.7	93.09	93	98.99	93.49	98.93	98.92	93.48	93.49	93.46	93.46	98.98	98.94	93.51	89.15	93.49	100	93.51	93.09	93.44	93.18	96.88	93.44	93.49	93.5	93.47	93.48	93.46	93.49	93.47	93.44	93.48	93.49	93.49	98.94	99.01	93.47	93.5
CZP3H7	92.67	92.98	98.97	98.84	98.86	88.23	92.89	92.52	92.63	92.61	91.55	92.93	92.69	92.52	93.5	98.96	93.52	93.51	98.79	98.96	98.84	98.84	93.52	93.51	99.03	89.19	98.97	93.5	100	92.58	98.47	92.69	93.47	98.48	98.58	98.49	98.96	98.94	98.3	98.87	98.9	98.47	98.94	98.86	98.92	93.52	93.49	98.2	98.29
SPF2A11	96.11	94.45	92.51	92.54	92.54	88.18	94.31	95.73	93.53	93.56	91	94.36	95.02	96.71	93.11	92.64	93.12	93.1	92.55	92.56	92.54	92.54	93.09	93.09	92.54	88.88	92.64	93.08	92.57	100	92.59	95.16	93.12	92.6	92.64	92.62	92.57	92.59	92.58	92.55	92.62	92.57	92.61	92.53	92.52	93.09	93.08	92.55	92.56
FRF1A1	92.74	93.04	98.36	98.31	98.3	88.16	92.83	92.49	92.58	92.54	91.51	92.91	92.61	92.51	93.49	98.42	93.54	93.53	98.28	98.39	98.21	98.23	93.53	93.46	98.36	89.03	98.42	93.44	98.47	92.59	100	92.67	93.45	99.8	98.63	98.93	98.34	98.4	98.61	98.35	98.33	99.64	98.4	98.34	98.36	93.47	93.45	98.14	98.21
FRF1D12	95.01	94.61	92.62	92.68	92.69	88.23	94.44	95.43	93.85	93.8	91.02	94.55	97.56	95.36	93.19	92.76	93.18	93.16	92.69	92.66	92.67	92.67	93.17	93.16	92.69	88.94	92.77	93.16	92.66	95.16	92.67	100	93.18	92.67	92.7	92.68	92.74	92.7	92.7	92.68	92.79	92.66	92.76	92.7	92.66	93.14	93.16	92.65	92.66
FRF1H7	93.23	93.81	93.43	93.43	93.45	88.29	93.74	93.02	92.76	92.76	91.35	93.78	93.12	93.01	96.89	93.46	96.95	96.94	93.45	93.46	93.43	93.43	96.89	96.91	93.48	89.15	93.46	96.88	93.47	93.12	93.45	93.19	100	93.45	93.47	93.48	93.43	93.45	93.45	93.46	93.44	93.44	93.45	93.46	93.46	96.84	96.91	93.44	93.42
FRF3E2	92.74	92.99	98.36	98.3	98.31	88.16	92.83	92.49	92.57	92.53	91.51	92.89	92.63	92.5	93.48	98.42	93.53	93.51	98.27	98.39	98.21	98.23	93.52	93.44	98.34	89.04	98.43	93.43	98.48	92.6	99.78	92.68	93.44	100	98.62	98.9	98.34	98.4	98.59	98.36	98.34	99.64	98.41	98.34	98.35	93.44	93.43	98.14	98.19
FRP2D7	92.73	93.04	98.61	98.44	98.53	88.17	92.91	92.53	92.67	92.62	91.56	92.96	92.66	92.56	93.52	98.62	93.58	93.58	98.42	98.57	98.42	98.45	93.58	93.5	98.56	89.03	98.62	93.5	98.58	92.64	98.63	92.71	93.48	98.62	100	98.93	98.53	98.63	98.74	98.5	98.56	98.62	98.57	98.51	98.51	93.52	93.49	98.24	98.3
FRP3A12	92.75	93.04	98.53	98.38	98.39	88.17	92.91	92.54	92.64	92.64	91.6	92.96	92.68	92.57	93.52	98.56	93.58	93.57	98.34	98.48	98.28	98.31	93.57	93.49	98.43	89.05	98.56	93.49	98.49	92.63	98.93	92.73	93.48	98.9	98.94	100	98.41	98.57	98.95	98.45	98.45	98.81	98.5	98.44	98.44	93.52	93.48	98.27	98.31
FRP3E11	92.71	93	99.89	99.76	99.79	88.15	92.87	92.49	92.61	92.58	91.55	92.92	92.65	92.53	93.48	99.89	93.49	93.49	99.73	99.86	99.6	99.64	93.49	93.46	99.8	89.04	99.89	93.47	98.96	92.58	98.34	92.74	93.44	98.34	98.54	98.4	100	99.79	98.41	99.78	99.74	98.41	99.85	99.82	99.81	93.49	93.46	98.18	98.26
FRP3E5	92.74	92.99	99.89	99.76	99.77	88.14	92.85	92.5	92.61	92.62	91.57	92.92	92.65	92.55	93.5	99.91	93.5	93.5	99.73	99.86	99.6	99.63	93.49	93.47	99.79	89.04	99.91	93.48	98.95	92.59	98.4	92.7	93.46	98.42	98.63	98.56	99.8	100	98.43	99.78	99.78	98.49	99.85	99.8	99.8	93.5	93.46	98.18	98.22
FRP3G5	92.75	93.03	98.47	98.25	98.33	88.39	92.9	92.5	92.67	92.71	91.62	92.96	92.66	92.52	93.51	98.47	93.58	93.57	98.33	98.34	98.33	98.33	93.57	93.48	98.34	89.14	98.47	93.46	98.31	92.59	98.63	92.72	93.46	98.61	98.75	98.95	98.44	98.44	100	98.38	98.42	98.61	98.45	98.32	98.31	93.49	93.48	98.17	98.14
FRP4D11	92.69	92.98	99.89	99.74	99.8	88.22	92.95	92.5	92.67	92.64	91.58	92.98	92.7	92.5	93.49	99.86	93.57	93.57	99.7	99.77	99.63	99.65	93.56	93.48	99.72	89.19	99.86	93.49	98.87	92.55	98.36	92.68	93.46	98.37	98.5	98.46	99.79	99.78	98.38	100	99.71	98.44	99.74	99.78	99.79	93.5	93.47	98.2	98.23
FRP4H3	92.82	93.21	99.88	99.71	99.67	88.21	92.91	92.49	92.65	92.62	91.54	92.95	92.66	92.51	93.5	99.88	93.49	93.5	99.63	99.77	99.52	99.54	93.49	93.47	99.69	89.11	99.89	93.46	98.89	92.63	98.34	92.81	93.46	98.35	98.56	98.46	99.74	99.79	98.42	99.72	100	98.39	99.88	99.71	99.77	93.49	93.47	98.17	98.19
FRP5A4	92.72	92.99	98.45	98.38	98.38	88.16	92.84	92.51	92.57	92.54	91.52	92.9	92.64	92.51	93.48	98.49	93.53	93.52	98.34	98.47	98.27	98.29	93.53	93.45	98.41	89.06	98.5	93.44	98.47	92.58	99.66	92.68	93.44	99.66	98.62	98.81	98.41	98.5	98.6	98.43	98.39	100	98.47	98.44	98.42	93.45	93.43	98.11	98.19
FRP5C5	92.8	93.2	99.91	99.77	99.78	88.16	92.91	92.5	92.64	92.62	91.55	92.96	92.63	92.5	93.49	99.94	93.49	93.49	99.72	99.83	99.64	99.68	93.48	93.46	99.82	89.05	99.94	93.48	98.93	92.62	98.4	92.78	93.45	98.41	98.56	98.5	99.84	99.84	98.45	99.73	99.86	98.46	100	99.77	99.81	93.49	93.46	98.21	98.23
FRP5D3	92.65	92.98	99.88	99.69	99.84	88.24	92.92	92.49	92.64	92.63	91.58	92.95	92.67	92.48	93.49	99.85	93.51	93.5	99.66	99.77	99.58	99.63	93.5	93.48	99.7	89.23	99.86	93.48	98.86	92.54	98.35	92.71	93.47	98.35	98.51	98.45	99.81	99.79	98.3	99.76	99.7	98.43	99.77	100	99.77	93.49	93.47	98.14	98.19
FRP5H7	92.65	92.98	99.89	99.69	99.78	88.24	92.94	92.51	92.67	92.62	91.61	92.98	92.77	92.49	93.47	99.87	93.49	93.5	99.7	99.84	99.6	99.63	93.48	93.48	99.76	89.48	99.87	93.48	98.92	92.53	98.36	92.68	93.46	98.34	98.5	98.44	99.81	99.79	98.31	99.78	99.75	98.41	99.81	99.77	100	93.5	93.46	98.18	98.21
GB29	93.19	93.72	93.5	93.47	93.49	88.2	93.67	93	92.75	92.74	91.3	93.69	93.09	93.01	99.19	93.51	99.25	99.24	93.5	93.5	93.49	93.49	99.12	99.12	93.51	89.15	93.51	98.93	93.52	93.09	93.45	93.16	96.84	93.44	93.51	93.52	93.49	93.49	93.48	93.5	93.48	93.44	93.49	93.49	93.5	100	99.19	93.49	93.52
GB30	93.24	93.74	93.47	93.46	93.48	88.22	93.69	93	92.75	92.75	91.35	93.74	93.07	93.01	99.69	93.48	99.38	99.36	93.48	93.48	93.46	93.46	99.02	99.28	93.5	89.18	93.49	98.99	93.5	93.09	93.44	93.16	96.91	93.44	93.48	93.49	93.47	93.47	93.48	93.48	93.47	93.44	93.47	93.48	93.48	99.19	100	93.47	93.51
GB51	92.66	92.96	98.25	98.29	98.17	88.28	92.9	92.49	92.65	92.63	91.57	92.94	92.65	92.48	93.47	98.22	93.49	93.49	98.2	98.18	98.3	98.3	93.49	93.48	98.16	89.3	98.23	93.46	98.2	92.55	98.14	92.65	93.44	98.13	98.24	98.26	98.18	98.17	98.14	98.2	98.17	98.11	98.21	98.15	98.18	93.49	93.47	100	98.31
GD25	92.69	92.98	98.24	98.24	98.19	88.27	92.91	92.53	92.64	92.59	91.57	92.96	92.66	92.49	93.5	98.22	93.51	93.51	98.18	98.26	98.22	98.22	93.51	93.5	98.21	89.3	98.23	93.49	98.28	92.58	98.2	92.67	93.42	98.19	98.3	98.31	98.25	98.21	98.13	98.21	98.18	98.18	98.23	98.19	98.21	93.52	93.5	98.32	100
GLR17	96.62	94.58	92.67	92.68	92.67	88.22	94.49	95.16	93.62	93.64	91.13	94.49	94.79	95.44	93.25	92.71	93.27	93.25	92.68	92.69	92.65	92.65	93.23	93.25	92.68	88.95	92.71	93.24	92.69	96.18	92.68	94.89	93.28	92.68	92.72	92.69	92.71	92.68	92.7	92.75	92.73	92.67	92.76	92.68	92.7	93.23	93.25	92.67	92.7
GLR2	96.55	94.51	92.57	92.6	92.6	88.21	94.34	95.1	93.52	93.54	91.06	94.43	94.69	95.47	93.22	92.64	93.23	93.2	92.6	92.6	92.57	92.57	93.18	93.2	92.58	88.95	92.64	93.15	92.6	96.22	92.59	94.81	93.24	92.58	92.64	92.61	92.67	92.62	92.61	92.64	92.66	92.57	92.69	92.64	92.59	93.18	93.21	92.61	92.6
HP3	96.1	94.42	92.56	92.56	92.57	88.19	94.3	95.72	93.49	93.56	91.03	94.33	95.02	96.67	93.08	92.62	93.1	93.08	92.57	92.58	92.56	92.56	93.06	93.07	92.56	88.88	92.62	93.05	92.58	97.83	92.62	95.14	93.15	92.61	92.66	92.64	92.61	92.62	92.61	92.61	92.61	92.61	92.62	92.58	92.57	93.05	93.07	92.56	92.58
IAUB11	92.7	92.97	98.31	98.27	98.19	88.21	92.89	92.48	92.6	92.61	91.54	92.95	92.63	92.51	93.47	98.29	93.51	93.5	98.26	98.32	98.2	98.21	93.49	93.49	98.26	89.16	98.3	93.49	98.39	92.57	98.22	92.65	93.47	98.22	98.59	98.43	98.24	98.21	98.32	98.22	98.19	98.26	98.27	98.23	98.28	93.5	93.47	98.32	98.31
L113	92.66	93.01	99.86	99.7	99.73	88.27	92.88	92.5	92.65	92.57	91.56	92.92	92.7	92.47	93.47	99.82	93.49	93.49	99.66	99.77	99.55	99.59	93.47	93.46	99.7	89.21	99.83	93.46	98.88	92.55	98.27	92.68	93.45	98.24	98.49	98.38	99.74	99.72	98.3	99.72	99.7	98.28	99.79	99.72	99.74	93.48	93.46	98.15	98.17
L116	93.21	93.74	93.51	93.49	93.51	88.24	93.69	93	92.75	92.74	91.33	93.73	93.06	92.99	98.67	93.52	98.68	98.67	93.5	93.51	93.48	93.48	98.81	98.73	93.51	89.16	93.52	98.7	93.54	93.07	93.5	93.16	96.87	93.48	93.52	93.52	93.51	93.48	93.52	93.53	93.5	93.48	93.49	93.51	93.51	98.76	98.74	93.5	93.54
L125	92.64	92.95	99.9	99.69	99.78	88.23	92.9	92.47	92.6	92.63	91.62	92.92	92.69	92.48	93.49	99.85	93.57	93.56	99.72	99.83	99.57	99.6	93.54	93.48	99.71	89.29	99.85	93.48	98.88	92.54	98.27	92.65	93.46	98.28	98.52	98.39	99.75	99.73	98.32	99.77	99.71	98.35	99.79	99.78	99.77	93.49	93.47	98.18	98.2
L141	95.04	94.56	92.7	92.71	92.71	88.24	94.46	95.45	93.82	93.78	91.05	94.49	97.23	95.38	93.17	92.81	93.16	93.16	92.72	92.72	92.72	92.73	93.16	93.15	92.73	88.98	92.81	93.12	92.72	95.2	92.72	98.02	93.19	92.72	92.78	92.78	92.72	92.75	92.76	92.71	92.9	92.72	92.79	92.71	92.67	93.11	93.13	92.68	92.7
L143	94.88	94.51	92.62	92.62	92.62	88.37	94.31	95.38	93.75	93.89	91.09	94.42	97.41	95.35	93.12	92.66	93.09	93.1	92.62	92.62	92.63	92.61	93.09	93.09	92.6	88.92	92.67	93.06	92.62	95.08	92.6	97.81	93.11	92.6	92.65	92.65	92.68	92.62	92.83	92.67	92.67	92.61	92.69	92.64	92.63	93.07	93.1	92.58	92.58
L144	96.86	94.52	92.67	92.66	92.68	88.21	94.48	95.23	93.59	93.6	91.12	94.52	94.84	95.46	93.27	92.7	93.26	93.27	92.68	92.67	92.65	92.67	93.25	93.25	92.67	88.98	92.7	93.24	92.69	96.16	92.68	94.9	93.27	92.67	92.7	92.72	92.66	92.67	92.7	92.7	92.69	92.67	92.68	92.68	92.65	93.24	93.27	92.69	92.7
L145	92.88	93.3	95.02	95.05	95.03	88.25	93.24	92.75	92.87	92.84	91.62	93.27	92.96	92.72	94.07	95.04	94.09	94.09	95.06	95.05	95.02	95.05	94.05	94.05	95.06	89.26	95.04	94.07	95.05	92.8	95	92.96	93.95	94.99	95.05	95.02	95.02	95.01	94.99	95.07	95.01	95.03	95.03	95.03	95.05	94.15	94.07	95.02	95.04
L231	95.3	94.65	92.72	92.75	92.77	88.21	94.56	95.58	93.66	93.74	91.12	94.58	95.54	95.38	93.3	92.83	93.29	93.29	92.81	92.82	92.76	92.77	93.29	93.28	92.8	88.95	92.83	93.28	92.78	95.21	92.76	95.64	93.32	92.76	92.8	92.79	92.74	92.77	92.77	92.79	92.8	92.77	92.78	92.79	92.75	93.28	93.29	92.75	92.79
L241	99.61	94.53	92.66	92.67	92.65	88.21	94.41	95.28	93.53	93.57	91.09	94.45	94.85	95.49	93.23	92.76	93.23	93.22	92.71	92.71	92.68	92.68	93.19	93.22	92.7	88.95	92.74	93.2	92.7	96.07	92.68	94.92	93.23	92.68	92.72	92.7	92.69	92.69	92.69	92.69	92.75	92.67	92.71	92.67	92.67	93.2	93.22	92.68	92.7
L244	95.3	94.62	92.72	92.72	92.75	88.23	94.53	95.59	93.64	93.73	91.13	94.57	95.57	95.35	93.28	92.82	93.27	93.27	92.81	92.79	92.77	92.79	93.27	93.27	92.86	88.95	92.82	93.26	92.75	95.21	92.74	95.63	93.3	92.73	92.76	92.75	92.78	92.76	92.75	92.8	92.79	92.79	92.75	92.78	92.75	93.26	93.28	92.71	92.75
L324	92.65	92.95	99.87	99.68	99.73	88.24	92.92	92.5	92.67	92.58	91.6	92.97	92.75	92.49	93.47	99.84	93.5	93.49	99.71	99.83	99.55	99.59	93.47	93.47	99.72	89.48	99.84	93.47	98.89	92.56	98.26	92.72	93.45	98.25	98.52	98.42	99.76	99.76	98.3	99.76	99.71	98.31	99.82	99.76	99.88	93.5	93.47	98.17	98.2
L353	96.82	94.52	92.64	92.67	92.64	88.21	94.37	95.15	93.57	93.58	91.06	94.48	94.75	95.45	93.3	92.71	93.29	93.29	92.66	92.66	92.64	92.63	93.29	93.27	92.64	88.95	92.71	93.28	92.69	96.18	92.7	94.84	93.3	92.7	92.71	92.73	92.72	92.7	92.68	92.68	92.72	92.71	92.71	92.67	92.67	93.27	93.27	92.69	92.68
L361	95.34	94.64	92.73	92.73	92.73	88.22	94.54	95.59	93.67	93.72	91.13	94.58	95.55	95.4	93.28	92.77	93.28	93.28	92.75	92.75	92.68	92.71	93.29	93.28	92.74	88.96	92.77	93.27	92.78	95.25	92.74	95.66	93.32	92.74	92.8	92.79	92.73	92.75	92.77	92.74	92.76	92.74	92.76	92.75	92.72	93.28	93.29	92.74	92.78
L364	95.31	94.66	92.73	92.73	92.75	88.23	94.54	95.6	93.65	93.73	91.11	94.56	95.54	95.39	93.29	92.78	93.29	93.29	92.75	92.75	92.71	92.72	93.29	93.28	92.74	88.96	92.78	93.25	92.77	95.24	92.76	95.67	93.32	92.76	92.81	92.8	92.73	92.76	92.76	92.76	92.77	92.77	92.78	92.76	92.73	93.26	93.29	92.73	92.77
L411	95.16	94.52	92.71	92.71	92.75	88.17	94.45	95.48	93.65	93.71	91.05	94.46	95.67	95.3	93.19	92.74	93.19	93.19	92.72	92.71	92.69	92.7	93.17	93.19	92.71	88.93	92.74	93.17	92.74	95.15	92.7	95.78	93.2	92.7	92.74	92.71	92.76	92.72	92.71	92.77	92.74	92.69	92.76	92.79	92.72	93.14	93.2	92.67	92.73
L563	95.29	94.63	92.69	92.7	92.7	88.22	94.53	95.59	93.66	93.72	91.12	94.56	95.54	95.34	93.26	92.74	93.24	93.24	92.72	92.72	92.67	92.7	93.26	93.25	92.72	88.92	92.73	93.24	92.75	95.22	92.71	95.69	93.3	92.71	92.75	92.75	92.68	92.71	92.74	92.7	92.73	92.71	92.75	92.7	92.68	93.24	93.25	92.69	92.73
Lp8	93.26	93.85	93.44	93.55	93.55	88.32	93.77	93	92.81	92.76	91.41	93.84	93.14	93	96.49	93.46	96.52	96.51	93.52	93.51	93.51	93.51	96.52	96.51	93.5	89.36	93.47	96.48	93.49	93.12	93.38	93.17	96.62	93.37	93.43	93.44	93.45	93.45	93.37	93.55	93.43	93.38	93.44	93.53	93.54	96.46	96.5	93.46	93.44
Norway	93.01	93.5	94.67	94.7	94.66	88.32	93.37	92.86	92.95	92.9	91.55	93.42	93.1	92.88	94.09	94.7	94.16	94.15	94.72	94.67	94.68	94.69	94.1	94.06	94.66	89.35	94.7	94.1	94.71	92.92	94.76	93.07	93.99	94.74	94.82	94.75	94.7	94.69	94.69	94.78	94.66	94.75	94.67	94.69	94.73	94.08	94.08	94.71	94.7
OL29	95.43	94.28	92.42	92.43	92.41	88.32	94.13	96.34	93.49	93.61	91.02	94.23	95.27	98.21	92.99	92.46	92.98	92.97	92.42	92.42	92.43	92.43	92.96	92.98	92.42	88.88	92.46	92.93	92.43	96.59	92.45	95.31	92.96	92.45	92.47	92.47	92.44	92.45	92.62	92.47	92.45	92.43	92.46	92.43	92.41	92.94	92.96	92.42	92.43
OS25	95.48	94.26	92.46	92.52	92.49	88.22	94.2	96.38	93.52	93.47	90.93	94.27	95.29	98.15	92.99	92.5	93	92.98	92.53	92.49	92.5	92.51	92.98	92.98	92.5	88.95	92.5	92.97	92.5	96.66	92.49	95.34	92.97	92.48	92.51	92.51	92.5	92.49	92.5	92.53	92.5	92.47	92.49	92.5	92.52	92.96	92.98	92.49	92.49
P1_14	92.64	92.97	98.37	98.31	98.32	88.27	92.9	92.5	92.64	92.62	91.58	92.96	92.68	92.49	93.47	98.36	93.57	93.56	98.21	98.35	98.22	98.23	93.56	93.48	98.33	89.3	98.37	93.46	98.32	92.54	98.3	92.66	93.46	98.28	98.37	98.43	98.36	98.34	98.68	98.31	98.31	98.27	98.36	98.28	98.32	93.48	93.46	98.4	98.29
P1NP1J	94.47	98.92	92.93	93.06	93.06	88.37	98.4	94.35	93.72	93.76	91.25	98.55	94.49	94.25	93.75	92.96	93.77	93.75	93.06	93.05	93.07	93.07	93.75	93.76	93	89.31	92.96	93.75	93.02	94.37	92.95	94.52	93.81	92.94	92.98	92.99	92.94	92.94	92.95	93.05	92.96	92.94	92.96	93.06	93.08	93.73	93.75	93.06	93.08
P1NP2H	94.48	98.91	92.92	93.05	93.06	88.36	98.39	94.36	93.72	93.75	91.24	98.54	94.49	94.26	93.75	92.96	93.77	93.75	93.05	93.05	93.07	93.07	93.75	93.76	93	89.24	92.95	93.75	93.01	94.36	92.94	94.52	93.81	92.94	92.97	92.98	92.93	92.94	92.94	93.05	92.96	92.94	92.96	93.06	93.08	93.73	93.75	93.06	93.08
P1NP2K	94.48	98.48	93	93.09	93.25	88.35	98.31	94.37	93.89	93.78	91.25	98.41	94.5	94.3	93.77	93.02	93.8	93.78	93.09	93.06	93.28	93.28	93.79	93.79	93.09	89.2	93.03	93.78	93.11	94.4	93.01	94.57	93.85	93.01	93.01	93.02	93	93	93	93.19	93	93	93.02	93.22	93.07	93.77	93.78	93.05	93.07
P2_5	93.24	93.73	93.46	93.46	93.47	88.22	93.68	93.01	92.76	92.75	91.35	93.73	93.08	93.01	99.68	93.48	99.37	99.36	93.48	93.48	93.46	93.46	99.01	99.27	93.5	89.25	93.48	98.98	93.49	93.09	93.44	93.17	96.91	93.44	93.48	93.49	93.46	93.47	93.48	93.47	93.46	93.44	93.47	93.47	93.47	99.19	99.9	93.48	93.5
P2_59	92.62	92.94	98.2	98.3	98.12	88.26	92.87	92.47	92.63	92.61	91.56	92.92	92.66	92.46	93.47	98.16	93.49	93.48	98.17	98.16	98.25	98.26	93.5	93.47	98.15	89.28	98.17	93.43	98.2	92.55	98.29	92.66	93.44	98.28	98.14	98.34	98.16	98.12	98.15	98.14	98.09	98.23	98.15	98.09	98.13	93.47	93.47	99.33	98.25
P221	92.66	92.96	99.91	99.73	99.83	88.25	92.93	92.52	92.65	92.61	91.58	92.95	92.73	92.51	93.48	99.87	93.5	93.51	99.68	99.82	99.66	99.67	93.5	93.48	99.82	89.28	99.88	93.49	98.92	92.56	98.37	92.7	93.47	98.37	98.57	98.51	99.86	99.86	98.33	99.83	99.81	98.44	99.86	99.83	99.83	93.5	93.48	98.2	98.2
Ps8	93.22	93.74	93.47	93.47	93.48	88.23	93.71	93.01	92.74	92.72	91.36	93.75	93.09	92.99	97.89	93.49	97.94	97.93	93.48	93.49	93.47	93.47	97.89	97.88	93.51	89.14	93.49	97.91	93.49	93.09	93.47	93.15	96.98	93.46	93.49	93.49	93.47	93.49	93.47	93.51	93.47	93.46	93.47	93.48	93.48	97.85	97.93	93.47	93.47
RCAM1026	93.22	93.75	93.49	93.47	93.5	88.25	93.71	93	92.75	92.74	91.33	93.75	93.08	93.02	98.72	93.5	98.69	98.69	93.49	93.5	93.47	93.47	98.71	98.77	93.51	89.18	93.5	98.72	93.53	93.08	93.48	93.17	96.89	93.48	93.5	93.51	93.47	93.49	93.49	93.5	93.48	93.48	93.49	93.49	93.5	98.69	98.74	93.5	93.53
RSF1B9	94.98	94.61	92.71	92.73	92.72	88.21	94.48	95.46	93.78	93.84	91.08	94.52	97.37	95.34	93.2	92.83	93.2	93.18	92.75	92.74	92.72	92.72	93.19	93.16	92.79	88.94	92.83	93.16	92.74	95.11	92.78	97.66	93.2	92.77	92.78	92.79	92.81	92.8	92.78	92.77	92.82	92.81	92.8	92.77	92.77	93.17	93.16	92.71	92.75
RSF2G1	94.48	98.94	92.93	93.06	93.07	88.36	98.41	94.36	93.72	93.76	91.25	98.55	94.49	94.27	93.75	92.96	93.77	93.75	93.06	93.06	93.08	93.08	93.76	93.77	93.01	89.24	92.96	93.75	93.02	94.37	92.95	94.53	93.82	92.94	92.98	92.99	92.94	92.94	92.94	93.06	92.96	92.95	92.96	93.07	93.08	93.74	93.76	93.06	93.08
SEF4B9	93.26	93.82	93.47	93.52	93.51	88.29	93.67	92.99	92.75	92.77	91.36	93.71	93.12	93.03	98.85	93.51	98.84	98.83	93.58	93.49	93.51	93.51	98.91	98.75	93.55	89.3	93.51	98.81	93.5	93.11	93.47	93.22	96.89	93.46	93.51	93.49	93.43	93.47	93.51	93.5	93.48	93.47	93.49	93.48	93.46	98.81	98.78	93.47	93.49
SEF4G12	89.41	89.47	89.5	89.52	89.55	88.61	89.35	89.26	89.46	89.36	89.41	89.38	89.36	89.32	89.47	89.61	89.5	89.46	89.55	89.53	89.54	89.53	89.46	89.46	89.54	88.66	89.61	89.56	89.53	89.33	89.58	89.44	89.47	89.59	89.61	89.61	89.62	89.65	89.52	89.54	89.61	89.6	89.61	89.54	89.54	89.46	89.44	89.49	89.52
SEF4H7	93.24	93.83	93.49	93.57	93.56	88.27	93.7	92.99	92.8	92.73	91.34	93.75	93.12	93	98.73	93.51	98.84	98.83	93.62	93.52	93.55	93.55	98.79	98.77	93.6	89.43	93.51	98.78	93.51	93.08	93.46	93.19	97.05	93.46	93.51	93.5	93.47	93.49	93.53	93.51	93.49	93.46	93.5	93.51	93.51	98.78	98.76	93.51	93.52
SEF5C12	93.21	93.76	93.51	93.49	93.55	88.22	93.7	92.99	92.75	92.76	91.36	93.73	93.08	93.01	98.8	93.52	98.91	98.91	93.5	93.51	93.49	93.5	98.83	98.82	93.52	89.14	93.52	98.74	93.52	93.08	93.48	93.17	96.91	93.47	93.51	93.52	93.5	93.53	93.5	93.51	93.5	93.47	93.51	93.53	93.53	99	98.83	93.48	93.52
SL16	95.48	94.3	92.41	92.4	92.4	88.34	94.15	96.35	93.5	93.54	90.98	94.25	95.28	98.12	92.98	92.46	92.99	92.97	92.42	92.41	92.41	92.41	92.99	92.98	92.41	88.84	92.46	92.96	92.4	96.68	92.44	95.35	92.98	92.43	92.48	92.46	92.45	92.46	92.59	92.47	92.45	92.43	92.45	92.42	92.41	92.96	92.96	92.4	92.4
Sm1021	83.97	84.09	84.04	83.91	83.97	83.99	84	83.94	83.95	83.82	83.93	83.99	83.99	83.98	83.89	83.95	83.93	83.88	84.03	83.94	84.03	84.05	83.89	83.87	83.95	83.9	83.95	83.86	83.99	83.86	83.92	83.96	83.81	83.94	83.91	83.9	83.97	83.99	83.95	83.99	84	83.9	83.97	83.96	83.94	83.85	83.85	83.95	83.93
SP15	95.46	94.27	92.45	92.44	92.43	88.33	94.12	96.35	93.5	93.53	90.99	94.2	95.31	98.06	92.98	92.49	92.98	92.96	92.45	92.45	92.44	92.45	92.97	92.97	92.45	88.87	92.5	92.93	92.44	96.62	92.45	95.38	92.95	92.45	92.51	92.48	92.48	92.48	92.62	92.48	92.48	92.44	92.48	92.45	92.43	92.94	92.96	92.42	92.43
SP4	95.43	94.26	92.41	92.47	92.44	88.2	94.14	96.38	93.51	93.46	90.93	94.25	95.27	98.22	93.01	92.47	93.01	92.99	92.51	92.46	92.43	92.44	93	93.01	92.46	88.93	92.47	92.98	92.47	96.61	92.42	95.31	93.02	92.41	92.48	92.48	92.45	92.45	92.48	92.49	92.46	92.39	92.46	92.45	92.48	92.98	93	92.47	92.45
SPF2F4	95.53	94.46	92.46	92.5	92.45	88.11	94.22	96.28	93.5	93.5	90.92	94.3	95.26	98.04	93.01	92.58	93	92.98	92.51	92.5	92.48	92.49	92.99	93	92.5	88.83	92.58	92.97	92.49	96.7	92.51	95.4	92.97	92.5	92.58	92.55	92.52	92.57	92.51	92.49	92.7	92.49	92.71	92.49	92.48	92.97	92.99	92.47	92.47
SPF4F3	94.48	98.94	92.93	93.06	93.08	88.37	98.41	94.36	93.72	93.75	91.24	98.55	94.48	94.28	93.75	92.96	93.76	93.75	93.06	93.06	93.08	93.08	93.75	93.76	93.01	89.24	92.96	93.75	93.02	94.37	92.95	94.52	93.81	92.94	92.97	92.99	92.94	92.94	92.94	93.06	92.97	92.95	92.96	93.07	93.09	93.73	93.75	93.06	93.08
SPF4F7	95.55	94.42	92.46	92.51	92.47	88.13	94.24	96.32	93.51	93.52	90.94	94.31	95.27	98.08	93.02	92.6	93.02	93	92.51	92.5	92.48	92.5	93.01	93.01	92.5	88.83	92.6	92.97	92.51	96.72	92.52	95.43	93	92.52	92.59	92.58	92.53	92.57	92.52	92.49	92.67	92.5	92.66	92.49	92.48	92.99	93	92.49	92.49
RSP1A1	94.92	94.53	92.73	92.92	93.14	88.33	94.48	95.42	93.88	93.85	91.11	94.48	97.14	95.37	93.17	92.83	93.19	93.17	92.96	92.86	93.15	93.15	93.17	93.15	92.93	89.27	92.83	93.15	92.79	95.08	92.74	97.39	93.18	92.74	92.77	92.75	92.75	92.74	92.75	92.97	92.84	92.74	92.75	92.99	92.83	93.13	93.16	92.75	92.82
RSP1E11	92.72	93	99.68	99.67	99.58	88.3	93.01	92.47	92.81	92.6	91.57	93.04	92.7	92.48	93.45	99.68	93.47	93.47	99.58	99.63	99.57	99.58	93.46	93.45	99.55	89.34	99.68	93.45	98.72	92.55	98.12	92.71	93.43	98.13	98.33	98.19	99.59	99.58	98.23	99.62	99.54	98.18	99.66	99.6	99.6	93.47	93.45	98.17	98.06
RSP1E6	94.49	98.51	92.99	93.16	93.31	88.39	98.26	94.35	93.87	93.77	91.25	98.35	94.51	94.31	93.77	93.02	93.8	93.78	93.21	93.05	93.3	93.3	93.79	93.79	93.18	89.34	93.02	93.78	93.1	94.39	93	94.57	93.85	93	93.02	93.02	93	92.99	93.04	93.18	93.02	92.99	93.01	93.21	93.06	93.77	93.77	93.06	93.06
RSP1F10	94.9	94.53	92.71	92.94	93.11	88.28	94.48	95.42	93.89	93.8	91.08	94.5	97.48	95.38	93.18	92.73	93.21	93.2	92.89	92.77	93.11	93.11	93.19	93.19	92.87	89.25	92.73	93.16	92.77	95.06	92.68	97.59	93.19	92.69	92.72	92.71	92.73	92.71	92.74	92.94	92.73	92.68	92.72	92.97	92.81	93.17	93.18	92.75	92.79
RSP1F2	94.94	94.5	92.73	92.88	92.88	88.33	94.49	95.5	93.81	93.87	91.13	94.49	97.29	95.43	93.18	92.75	93.2	93.19	92.87	92.86	92.87	92.88	93.18	93.16	92.85	89.19	92.75	93.16	92.82	95.11	92.73	97.42	93.18	92.73	92.75	92.75	92.77	92.77	92.73	92.87	92.73	92.77	92.75	92.9	92.91	93.16	93.17	92.84	92.9
SS21	95.48	94.28	92.45	92.44	92.45	88.36	94.16	96.34	93.49	93.58	91.02	94.23	95.34	97.98	92.98	92.51	92.99	92.97	92.46	92.46	92.45	92.45	92.97	92.97	92.45	88.87	92.51	92.95	92.46	96.68	92.5	95.36	93	92.48	92.52	92.5	92.47	92.48	92.63	92.49	92.49	92.47	92.48	92.45	92.44	92.95	92.98	92.42	92.44
SEP2D7	92.71	93	99.7	99.66	99.58	88.31	93.01	92.48	92.8	92.6	91.57	93.03	92.71	92.48	93.45	99.68	93.47	93.47	99.59	99.63	99.54	99.55	93.46	93.44	99.55	89.34	99.68	93.44	98.72	92.55	98.13	92.71	93.43	98.15	98.33	98.21	99.59	99.59	98.24	99.61	99.55	98.2	99.66	99.59	99.6	93.46	93.45	98.17	98.07
SEP2G2	92.7	92.99	99.88	99.65	99.82	88.27	93.02	92.5	92.82	92.62	91.59	93.04	92.7	92.5	93.49	99.87	93.5	93.5	99.65	99.76	99.57	99.58	93.5	93.48	99.64	89.35	99.87	93.47	98.84	92.55	98.36	92.72	93.47	98.37	98.56	98.44	99.77	99.8	98.34	99.82	99.68	98.44	99.8	99.82	99.77	93.49	93.48	98.15	98.2
SEP3F1	92.71	92.99	99.71	99.67	99.63	88.29	92.95	92.48	92.66	92.59	91.57	92.96	92.71	92.48	93.45	99.69	93.47	93.47	99.61	99.64	99.62	99.63	93.46	93.45	99.62	89.34	99.69	93.45	98.74	92.54	98.18	92.71	93.43	98.19	98.34	98.25	99.66	99.66	98.24	99.64	99.62	98.24	99.67	99.61	99.62	93.47	93.45	98.18	98.07
SEP4B10	92.74	93.08	99.69	99.66	99.59	88.39	92.99	92.5	92.72	92.63	91.58	93.05	92.81	92.51	93.52	99.65	93.54	93.54	99.68	99.6	99.59	99.59	93.53	93.52	99.52	89.72	99.66	93.52	98.87	92.59	98.37	92.71	93.48	98.36	98.41	98.37	99.64	99.63	98.27	99.6	99.53	98.34	99.63	99.57	99.61	93.54	93.51	98.28	98.24
SEP5D11	92.7	93.06	99.76	99.66	99.64	88.3	93.03	92.48	92.85	92.61	91.6	93.07	92.78	92.49	93.47	99.74	93.5	93.49	99.92	99.68	99.54	99.54	93.49	93.47	99.58	89.65	99.74	93.47	98.78	92.55	98.22	92.69	93.45	98.22	98.4	98.29	99.67	99.66	98.32	99.68	99.58	98.28	99.71	99.64	99.7	93.49	93.47	98.19	98.19
TOM	94.89	94.44	92.61	92.64	92.6	88.19	94.32	95.37	93.76	93.75	90.99	94.45	97.98	95.29	93.06	92.66	93.09	93.08	92.66	92.63	92.61	92.62	93.08	93.07	92.63	88.93	92.66	93.06	92.62	95	92.59	97.8	93.07	92.56	92.63	92.57	92.64	92.64	92.6	92.68	92.64	92.57	92.63	92.65	92.67	93.06	93.06	92.62	92.63
UPM1131	95.12	94.6	92.77	92.84	92.83	88.3	94.55	95.56	93.72	93.7	91.17	94.56	95.67	95.33	93.18	92.77	93.22	93.2	92.86	92.8	92.81	92.82	93.22	93.2	92.8	89.16	92.77	93.2	92.84	95.14	92.77	95.64	93.26	92.77	92.79	92.8	92.76	92.77	92.75	92.84	92.75	92.77	92.76	92.81	92.88	93.18	93.17	92.79	92.78
UPM1134	93.22	93.78	93.52	93.56	93.55	88.27	93.73	93.03	92.8	92.77	91.38	93.77	93.14	93.01	97.88	93.52	97.91	97.9	93.58	93.53	93.54	93.55	97.89	97.91	93.53	89.36	93.52	97.88	93.55	93.11	93.49	93.16	96.69	93.48	93.51	93.5	93.5	93.51	93.5	93.55	93.49	93.49	93.51	93.55	93.59	97.87	97.93	93.57	93.53
UPM1137	92.68	93	98.44	98.25	98.34	88.21	92.97	92.54	92.72	92.62	91.57	93.02	92.7	92.5	93.5	98.42	93.55	93.55	98.25	98.35	98.23	98.25	93.54	93.51	98.34	89.26	98.43	93.52	98.33	92.59	98.38	92.67	93.49	98.36	99.29	98.63	98.36	98.39	98.42	98.34	98.37	98.41	98.38	98.35	98.38	93.53	93.5	98.17	98.21
UPM791	92.7	93.05	99.82	99.93	99.72	88.32	92.99	92.49	92.81	92.61	91.55	93.01	92.74	92.48	93.47	99.78	93.48	93.49	99.64	99.72	99.79	99.8	93.48	93.46	99.7	89.39	99.78	93.46	98.83	92.55	98.3	92.7	93.44	98.3	98.44	98.38	99.75	99.75	98.27	99.73	99.69	98.36	99.77	99.68	99.68	93.48	93.46	98.28	98.25
UPM988	92.7	92.99	99.88	99.66	99.78	88.29	92.97	92.5	92.79	92.6	91.54	93.01	92.72	92.5	93.49	99.88	93.5	93.51	99.59	99.77	99.58	99.59	93.5	93.48	99.75	89.3	99.88	93.49	98.88	92.56	98.35	92.73	93.48	98.37	98.57	98.5	99.85	99.86	98.3	99.82	99.8	98.43	99.83	99.78	99.75	93.49	93.48	98.17	98.15
USDA2370	92.65	93.04	99.86	99.67	99.78	88.24	92.96	92.47	92.72	92.63	91.59	92.98	92.67	92.47	93.46	99.83	93.48	93.48	99.64	99.75	99.51	99.55	93.47	93.46	99.61	89.27	99.84	93.46	98.82	92.52	98.29	92.65	93.45	98.25	98.47	98.35	99.72	99.69	98.3	99.77	99.63	98.32	99.73	99.79	99.79	93.48	93.45	98.13	98.18
Vaf-10	94.82	94.51	92.67	92.75	92.69	88.37	94.43	95.32	93.66	93.69	91.07	94.43	95.48	95.08	93.15	92.7	93.17	93.16	92.78	92.73	92.75	92.75	93.13	93.15	92.71	89.19	92.7	93.13	92.73	94.89	92.66	95.56	93.16	92.66	92.69	92.65	92.67	92.64	92.65	92.74	92.65	92.66	92.67	92.71	92.75	93.12	93.15	92.72	92.73
Vaf-108	95.11	94.53	92.71	92.76	92.7	88.43	94.47	95.53	93.66	93.7	91.14	94.5	95.53	95.27	93.22	92.73	93.24	93.23	92.78	92.75	92.75	92.76	93.24	93.22	92.73	89.12	92.74	93.21	92.77	95.12	92.68	95.57	93.25	92.67	92.75	92.69	92.69	92.69	92.69	92.76	92.67	92.68	92.73	92.75	92.78	93.2	93.22	92.75	92.75
Vaf12	94.64	95.25	93.1	93.18	93.13	88.42	95.13	94.63	93.95	93.89	91.3	95.27	94.77	94.58	93.68	93.13	93.7	93.69	93.2	93.15	93.15	93.17	93.71	93.7	93.15	89.28	93.13	93.67	93.14	94.58	93.07	94.8	93.73	93.05	93.11	93.09	93.12	93.11	93.1	93.15	93.09	93.08	93.12	93.13	93.2	93.67	93.68	93.15	93.12
Vaf46	93.29	93.41	93.03	93.12	93.06	88.36	93.37	93.04	92.67	92.6	91.18	93.44	93.06	93	94.91	93.09	94.9	94.91	93.16	93.12	93.09	93.11	94.91	94.92	93.1	89.3	93.09	94.88	93.1	93.08	93.05	93.12	94.89	93.04	93.04	93.05	93.07	93.06	93.03	93.1	93.04	93.04	93.06	93.08	93.13	94.88	94.9	93.11	93.09
Vc2	93.24	93.79	93.44	93.47	93.52	88.36	93.78	93.02	92.79	92.74	91.46	93.8	93.17	93.02	96.49	93.44	96.51	96.5	93.62	93.53	93.48	93.48	96.52	96.52	93.46	89.58	93.45	96.49	93.47	93.12	93.42	93.15	96.59	93.41	93.45	93.47	93.42	93.43	93.4	93.5	93.41	93.4	93.43	93.53	93.63	96.47	96.52	93.48	93.5
VF39	94.58	98.73	92.96	92.96	92.96	88.26	98.31	94.31	93.7	93.77	91.2	98.47	94.4	94.31	93.74	93.1	93.74	93.72	93.02	93	93	93.01	93.72	93.73	92.99	88.98	93.1	93.72	92.98	94.42	93.02	94.59	93.79	93.01	93.04	93.05	92.99	93.01	93.01	92.99	93.23	93.02	93.2	92.98	92.97	93.72	93.72	92.97	92.98
Vh3	93.27	93.82	93.43	93.42	93.42	88.25	93.75	93.03	92.73	92.73	91.38	93.83	93.11	93.02	96.52	93.44	96.54	96.52	93.43	93.44	93.41	93.41	96.54	96.55	93.44	89.16	93.45	96.48	93.45	93.13	93.43	93.18	96.64	93.41	93.45	93.47	93.43	93.44	93.44	93.45	93.44	93.42	93.41	93.44	93.44	96.5	96.55	93.43	93.45
WSM1455	94.52	95.96	92.95	92.91	92.95	88.24	95.79	94.36	93.72	93.74	91.22	95.86	94.42	94.37	93.6	93	93.64	93.62	92.95	92.96	92.94	92.94	93.6	93.61	92.96	88.95	93	93.58	92.95	94.36	92.94	94.55	93.64	92.95	93	93.02	93.01	93.03	92.96	93	93	92.97	92.99	92.98	92.97	93.58	93.6	92.93	92.94
WSM1481	94.55	95.94	92.94	92.9	92.96	88.27	95.8	94.32	93.71	93.77	91.23	95.86	94.43	94.35	93.62	93	93.64	93.63	92.95	92.95	92.94	92.94	93.61	93.64	92.95	89	93	93.61	92.95	94.38	92.95	94.55	93.67	92.95	93	93.02	93.02	93.03	92.94	93	92.99	92.97	92.99	92.98	92.97	93.61	93.63	92.92	92.93
WSM1689	94.78	94.38	92.54	92.49	92.52	88.07	94.3	95.41	93.42	93.44	90.93	94.33	94.76	95.85	92.98	92.54	92.99	92.97	92.53	92.52	92.5	92.5	92.96	92.99	92.5	88.81	92.54	92.98	92.52	95.3	92.51	94.86	93	92.52	92.55	92.55	92.52	92.51	92.5	92.52	92.53	92.49	92.54	92.5	92.49	92.98	92.97	92.49	92.5
[truncated: 74 more columns]

## Sheet: Supplementary table S9
Supplementary table S9: Presence/absence of genomic regions associated with EPC phenotypes in pea, fababean and lentil.
The presence of a genomic region is coded by 1 and absence by 0. In each condition, isolates used for the genomic comparison are indicated in bold. † Presence of the nodX gene. * p-value < 0.05.** p-value < 0.01.
Pea cv. Kayanne									Pea cv. Isard																				Pea cv. Afghanistan JI1357
Gene identifier					PK1	PK2			Gene identifier					PI1	PI2	PI3	PI4	PI5	PI6	PI7	PI8	PI9	PI10	PI11	PI12	PI13			Gene identifier					PA1	PA2	PA3	PA4	PA5	PA6
Isolates	EPC index	Genospecies	Nod-type	Nod groups					Isolates	EPC index	Genospecies	Nod-type	Nod groups																Isolates	EPC index	Genospecies	Nod-type	Nod groups
TOM	0	gsN	B	B5	0	0			BLR195	0	R. binae	B	B4	0	0	0	0	0	0	0	0	0	0	0	0	0			TOM	0	gsN	B	B5†	0	0	0	0	0	0
FRP3E11	0	gsE	B	B4	0	1			CCBAU10279	0	gsR	B	B5	0	0	0	0	0	0	0	0	0	0	0	0	0			CCBAU83268	1.6	gsN	B	B5†	0	0	0	0	0	0
UPM1134	0.1	gsC	A	A5	0	1			CCBAU11080	0	gsG	B	B5	0	0	0	0	0	0	0	0	0	0	0	0	0			CCBAU10279	9.4	gsR	B	B5†	1	1	1	1	1	1
CCBAU83268	0.1	gsN	B	B5	0	0			CCBAU83268	0	gsN	B	B5	0	0	0	0	0	0	0	0	0	0	0	0	0			CCBAU11080	18.8	gsG	B	B5†	1	1	1	1	1	1
GLR17	0.1	gsQ	B	B4	0	0			GLR17	0	gsQ	B	B4	0	0	0	0	0	0	0	0	0	0	0	0	0			BLR195	60	R. binae	B	B4†	1	1	1	1	1	1
P1NP2K	0.1	gsB	A	A3	0	0			SL16	0	gsR	B	B3	0	0	0	0	0	0	0	0	0	0	0	0	0							p-value	0.08326	0.08326	0.08326	0.08326	0.08326	0.08326
OS25	0.2	gsR	B	B3	0	0			TOM	0	gsN	B	B5	0	0	0	0	0	0	0	0	0	0	0	0	0
SL16	0.2	gsR	B	B3	0	0			FRP3E11	0.1	gsE	B	B4	1	1	1	1	1	1	1	0	0	0	1	1	1
IAUb11	0.5	gsE	A	A4	1	1			OS25	0.3	gsR	B	B3	0	0	0	0	0	0	0	0	1	1	0	0	0
GB-29	0.5	gsC	A	A1	0	1			GB-29	0.4	gsC	A	A1	1	1	0	0	1	1	1	1	0	0	1	1	1
GLR2	0.8	gsQ	B	B4	0	0			GLR2	0.9	gsQ	B	B4	0	0	0	0	0	0	0	0	0	0	0	0	0
CCBAU10279	0.9	gsR	B	B5	0	0			UPM1134	1.2	gsC	A	A5	1	1	0	0	1	1	1	1	1	1	1	1	1
FRP3G5	0.9	gsE	B	B3	0	0			CCBAU43229	1.3	R. anhuiense	B	B3	0	0	1	1	1	0	0	0	0	0	0	0	0
CCBAU43229	0.9	R. anhuiense	B	B3	0	0			FRP3G5	1.4	gsE	B	B3	1	1	1	1	1	1	1	1	0	0	1	1	1
GB-51	1	gsE	A	A1	1	1			P1NP2K	2.9	gsB	A	A3	1	1	1	1	1	1	0	1	1	1	0	1	1
CCBAU11080	1.1	gsG	B	B5	0	0			P221	2.9	gsE	A	A1	1	1	1	1	1	1	1	1	1	1	1	1	1
FRP4D11	2.6	gsE	A	A3	1	1			L125	3	gsE	A	A1	1	1	1	1	1	1	1	1	1	1	1	1	1
BLR195	2.8	R. binae	B	B4	0	1			IAUb11	3.7	gsE	A	A4	1	1	1	1	1	1	1	1	0	0	1	1	1
P221	4	gsE	A	A1	1	1			GB-51	3.9	gsE	A	A1	1	1	1	1	1	1	1	1	0	0	1	1	1
Lp8	4.9	gsC	A	A4	1	0			CZP3G4	4.1	R. pisi	A	A1	1	1	1	1	1	0	0	0	0	0	0	0	0
Rlv3841	5.2	gsB	B	B1	0	0			Lp8	4.3	gsC	A	A4	1	1	0	0	1	1	1	1	1	1	1	1	1
CZP3G4	8	R. pisi	A	A1	1	1			L113	4.4	gsE	A	A1	1	1	1	1	1	1	1	1	1	1	1	1	1
CZP1G9	9.4	gsE	A	A4	1	1			FRP4D11	9	gsE	A	A3	1	1	1	1	1	1	1	1	1	1	1	1	1
L125	10.9	gsE	A	A1	1	1			P1NP2H	14.3	gsB	A	A4	1	1	1	1	1	1	1	1	1	1	1	1	1
P1NP2H	19	gsB	A	A4	1	1			CZP1G9	18.1	gsE	A	A4	1	1	1	1	1	1	1	1	1	1	1	1	1
L113	26.1	gsE	A	A1	1	1			Rlv3841	23.7	gsB	B	B1	1	1	1	1	1	1	1	1	1	1	1	1	1
	p-value	0.3768	0.0253*	0.0931	0.00054**	0.0477*				p-value	0.0322*	0.0006**	0.0042**	0.00008**	0.00008**	0.00023**	0.00023**	0.00006**	0.0004**	0.00067**	0.00015**	0.00127**	0.00127**	0.00067**	0.0004**	0.0004**
Lentil cv. Anicia													Lentil cv. Rosana									Lentil cv. Flora
Gene identifier					LA1	LA2	LA3	LA4	LA5	LA6			Gene identifier					LR1	LR2			Gene identifier					LF1	LF2	LF3	LF4	LF5	LF6	LF7
Isolates	EPC index	Genospecies	Nod-type	Nod groups									Isolates	EPC index	Genospecies	Nod-type	Nod groups					Isolates	EPC index	Genospecies	Nod-type	Nod groups
TOM	0	gsN	B	B5	0	0	0	0	1	0			GB-29	0	gsC	A	A1	0	0			TOM	0	gsN	B	B5	0	0	0	0	0	0	0
FRP3E11	0.2	gsE	B	B4	1	1	1	1	1	0			TOM	0	gsN	B	B5	0	1			UPM1134	0	gsC	A	A5	0	0	0	0	0	0	0
CCBAU83268	0.2	gsN	B	B5	0	0	0	0	0	0			FRP3E11	0.2	gsE	B	B4	0	0			GB-29	0.1	gsC	A	A1	0	0	0	0	0	0	0
GB-29	0.5	gsC	A	A1	0	0	0	0	0	0			UPM1134	0.3	gsC	A	A5	0	1			GB-51	0.1	gsE	A	A1	0	0	0	0	0	0	0
BLR195	0.6	out	B	B4	0	0	0	0	0	0			GB-51	0.4	gsE	A	A1	0	0			FRP3E11	0.1	gsE	B	B4	0	0	0	0	0	0	0
GB-51	0.7	gsE	A	A1	0	0	0	0	0	1			CCBAU83268	0.5	gsN	B	B5	0	0			IAUb11	0.1	gsE	A	A4	1	1	1	0	0	0	1
UPM1134	0.7	gsC	A	A5	0	0	0	0	0	1			CCBAU43229	0.6	R. anhuiense	B	B3	0	0			CCBAU43229	0.4	R. anhuiense	B	B3	0	0	0	0	0	0	0
CCBAU43229	1.1	R. anhuiense	B	B3	0	0	0	0	0	0			P221	0.9	gsE	A	A1	0	0			Lp8	0.4	gsC	A	A4	0	0	0	0	0	0	0
CZP3G4	1.2	R. pisi	A	A1	0	0	0	0	0	0			CZP3G4	1.1	R. pisi	A	A1	0	0			P221	0.5	gsE	A	A1	0	0	0	0	0	0	0
OS25	1.3	gsR	B	B3	0	0	0	0	1	0			CZP1G9	1.7	gsE	A	A4	0	0			CCBAU83268	0.5	gsN	B	B5	1	1	1	0	0	1	1
CCBAU11080	1.4	gsG	B	B5	0	0	0	0	0	0			IAUb11	2.2	gsE	A	A4	0	1			CZP3G4	0.6	R. pisi	A	A1	0	0	0	0	0	0	0
Lp8	1.6	gsC	A	A4	0	0	0	0	0	0			GLR17	2.4	gsQ	B	B4	0	0			OS25	1.2	gsR	B	B3	0	0	0	0	0	0	0
CZP1G9	2.3	gsE	A	A4	1	1	1	0	0	0			CCBAU11080	2.7	gsG	B	B5	0	1			BLR195	1.3	R. binae	B	B4	0	0	0	0	0	0	0
P221	2.4	gsE	A	A1	0	0	0	0	1	0			Lp8	2.7	gsC	A	A4	0	1			L113	1.4	gsE	A	A1	0	0	0	0	0	0	0
GLR17	2.9	gsQ	B	B4	1	1	1	0	0	0			SL16	2.9	gsR	B	B3	0	0			CZP1G9	1.9	gsE	A	A4	0	0	0	0	0	0	0
SL16	4	gsR	B	B3	0	0	0	0	1	0			OS25	3.2	gsR	B	B3	0	1			SL16	2.3	gsR	B	B3	0	0	0	0	0	0	0
CCBAU10279	4.2	gsR	B	B5	0	0	0	0	1	0			L113	4.3	gsE	A	A1	1	1			CCBAU11080	2.3	gsG	B	B5	1	1	1	0	0	1	1
IAUb11	4.2	gsE	A	A4	0	0	0	0	0	0			BLR195	4.5	R. binae	B	B4	0	0			FRP3G5	3	gsE	B	B3	0	0	0	0	0	0	0
FRP3G5	5.9	gsE	B	B3	0	0	0	0	0	0			CCBAU10279	5	gsR	B	B5	0	0			CCBAU10279	3.5	gsR	B	B5	1	0	0	0	0	0	0
FRP4D11	5.9	gsE	A	A3	1	1	1	1	1	0			FRP3G5	5.3	gsE	B	B3	0	0			L125	3.8	gsE	A	A1	0	0	0	0	0	0	0
GLR2	6.8	gsQ	B	B4	1	1	1	0	0	0			FRP4D11	5.3	gsE	A	A3	0	0			P1NP2H	5.9	gsB	A	A4	0	0	0	0	0	0	0
Rlv3841	8.1	gsB	B	B1	1	1	1	1	1	1			P1NP2K	7.4	gsB	A	A3	1	1			FRP4D11	7.1	gsE	A	A3	1	1	1	1	1	1	1
L113	8.1	gsE	A	A1	1	1	1	1	1	1			P1NP2H	9.6	gsB	A	A4	1	1			P1NP2K	10.9	gsB	A	A3	1	1	1	1	1	1	1
P1NP2K	8.2	gsB	A	A3	1	1	1	1	1	1			Rlv3841	9.9	gsB	B	B1	1	1			Rlv3841	11.6	gsB	B	B1	1	1	1	1	1	1	1
P1NP2H	13.3	gsB	A	A4	1	1	1	1	1	1			L125	11.3	gsE	A	A1	1	1			GLR17	13.4	gsQ	B	B4	1	1	1	1	1	1	1
L125	14.3	gsE	A	A1	1	1	1	1	1	1			GLR2	15.5	gsQ	B	B4	1	1			GLR2	27.7	gsQ	B	B4	1	1	1	1	1	1	1
	p-value	0.07252	0.218	0.3429	0.0031**	0.0031**	0.0031**	0.006**	0.0475*	0.026*				p-value	0.1415	0.7582	0.4027	0.0007**	0.0758*				p-value	0.0489*	0.3683	0.2301	0.0095**	0.0179*	0.0179*	0.0006**	0.0006**	0.00284**	0.0179*

## Sheet: Supplementary table S10
Supplementary table S10: Mono-inoculation of the Pisum sativum cv 'Afghanistan' with some Nod type A and B NodX-Rlv strains, included in the Rlv core collection.
	Nod type	Nodule number
		Mean	SD
3841	B	0	0
TOM	B	17.4	12.6
P221	A	0	0
CZP1G1	A	0	0
CZP3G4	A	0	0
BLR195	B	12	2.8
CCBAU11080	B	22.6	9.5
CCBAU83268	B	12	7.9
Note: Plants were cultivated in the condition used for DNA metabarcoding. For each conditions 6 plants were mono-inoculated at sowing and harvested 3 weeks post-inoculation. The 3841 and TOM Rlv strains were used as negative and positive controls respectively. SD is standard deviation.

## Sheet: Supplementary table S11
Supplementary table S11: Presence/absence of genomic regions in Nod-type A and Nod-type B Rlv strains carrying NodX, associated with an EPC with Pisum sativum cv ‘Afghanistan’
Isolates	EPC	Genospecies	Nod-type	Nod groups	Gene identifier
					PAFN1	PAFN2	PAFN3	PAFN4	PAFN5	PAFN6	PAFN7	PAFN8	PAFN9	PAFN10	PAFN11	PAFN12	PAFN13	PAFN14	PAFN15	PAFN16	PAFN17
P221	No	gsE	A	A1†	0	0	0	0	0	0	0	0	0	0	0	0	0	0	0	0	0
CZP1G1	No	gsE	A	A1†	0	0	0	0	0	0	0	0	0	0	0	0	0	0	0	0	0
CZP3G4	No	out	A	A1†	0	0	0	0	0	0	0	0	0	0	0	0	0	0	0	0	0
TOM	Yes	gsN	B	B5†	1	1	1	1	1	1	1	1	1	1	1	1	1	1	1	1	1
CCBAU83268	Yes	gsN	B	B5†	1	1	1	1	1	1	1	1	1	1	1	1	1	1	1	1	1
CCBAU11080	Yes	gsG	B	B5†	1	1	1	1	1	1	1	1	1	1	1	1	1	1	1	1	1
CCBAU10279	Yes	gsR	B	B5†	1	1	1	1	1	1	1	1	1	1	1	1	1	1	1	1	1
BLR195	Yes	out	B	B4†	1	1	1	1	1	1	1	1	1	1	1	1	1	1	1	1	1
Notes: Rlv strains used for the genomic comparison are indicated in column 1. They all contain nodX† in their genome. The presence of genomic regions is coded by 1 and absence by 0.

[truncated: 3 more sheets: Supplementary table S12, Supplementary table S13, Supplementary table S14]
